1 **Title:** Protective mucosal immunity against SARS-CoV-2 after heterologous systemic RNA-mucosal  
2 adenoviral vector immunization

3 **Authors:** Dennis Lapuente<sup>1\*</sup>, Jana Fuchs<sup>1</sup>, Jonas Willar<sup>1</sup>, Ana V Antão<sup>1</sup>, Valentina Eberlein<sup>2,3</sup>, Nadja  
4 Uhlig<sup>2,3</sup>, Leila Issmail<sup>2,3</sup>, Anna Schmidt<sup>1</sup>, Friederike Oltmanns<sup>1</sup>, Antonia Sophia Peter<sup>1</sup>, Sandra Mueller-  
5 Schmucker<sup>1</sup>, Pascal Irrgang<sup>1</sup>, Kirsten Fraedrich<sup>1</sup>, Andrea Cara<sup>4</sup>, Markus Hoffmann<sup>5,6</sup>, Stefan  
6 Pöhlmann<sup>5,6</sup>, Armin Ensser<sup>1</sup>, Cordula Pertl<sup>7</sup>, Torsten Willert<sup>7</sup>, Christian Thirion<sup>7</sup>, Thomas Grunwald<sup>2,3</sup>,  
7 Klaus Überla<sup>1</sup>, Matthias Tenbusch<sup>1\*</sup>

8 \*Corresponding authors

### 9 **Affiliations**

10 <sup>1</sup>Institute of Clinical and Molecular Virology, University Hospital Erlangen, Friedrich-Alexander  
11 University Erlangen-Nürnberg, Erlangen, Germany

12 <sup>2</sup>Department of Immunology, Fraunhofer Institute for Cell Therapy and Immunology, IZI, Leipzig,  
13 Germany

14 <sup>3</sup>Fraunhofer Cluster of Excellence Immune-mediated Diseases CIMD, Frankfurt am Main, Germany

15 <sup>4</sup>National Center for Global Health, Istituto Superiore di Sanità, Rome, Italy

16 <sup>5</sup>Infection Biology Unit, German Primate Center-Leibniz Institute for Primate Research, Göttingen,  
17 Germany

18 <sup>6</sup>Faculty of Biology and Psychology, Georg-August-University Göttingen, Wilhelmsplatz 1, 37073  
19 Göttingen, Germany

20 <sup>7</sup>Sirion Biotech, Martinsried, Germany

21

22

23

## 24 **Abstract**

25 Several effective SARS-CoV-2 vaccines are currently in use, but in the light of waning immunity and the  
26 emergence of novel variants, effective boost modalities are needed in order to maintain or even  
27 increase immunity. Here we report that intranasal vaccinations with adenovirus 5 and 19a vectored  
28 vaccines following a systemic DNA or mRNA priming result in strong systemic and mucosal immunity  
29 in mice. In contrast to two intramuscular injections with an mRNA vaccine, the mucosal boost with  
30 adenoviral vectors induced high levels of IgA and tissue-resident memory T cells in the respiratory  
31 tract. Mucosal neutralization of virus variants of concern was also enhanced by the intranasal boosts.  
32 Importantly, priming with mRNA provoked a more comprehensive T cell response consisting of  
33 circulating and tissue-resident memory T cells after the boost, while a DNA priming induced mostly  
34 mucosal T cells. Concomitantly, the intranasal boost strategies provided protection against  
35 symptomatic disease. Therefore, a mucosal booster immunization after mRNA priming is a promising  
36 approach to establish mucosal immunity in addition to systemic responses.

37

## 38 **Introduction**

39 The severe acute respiratory syndrome coronavirus 2 (SARS-CoV-2) emerged in late 2019 and caused  
40 a worldwide pandemic accounting for over 190 million infections and 4 million deaths at the time of  
41 this report <sup>1</sup>. In an unprecedented speed, academic institutions and biotech companies developed,  
42 evaluated, and licensed several SARS-CoV-2 vaccines. Beside traditional approaches like protein  
43 subunit or inactivated virus vaccines, gene-based vaccines were at the forefront of the developmental  
44 process and the first to become licensed <sup>2</sup>.

45 Vaccines based on messenger RNA (mRNA) or adenoviral vectors (Ad) demonstrated efficacy against  
46 SARS-CoV-2 infections and, most importantly, against severe coronavirus disease 2019 (COVID-19) and  
47 death <sup>3-6</sup>. Humoral as well as cellular immune responses against the spike (S) surface protein were  
48 successfully induced by both types of vaccines <sup>7-11</sup>. However, breakthrough infections of fully

49 vaccinated individuals have been reported and the numbers might increase in the phase of waning  
50 immunity<sup>12–18</sup>. The impact of immune escape and newly emerging virus variants (i.e. variants of  
51 concern, VOCs) is controversially discussed in some of these studies. Upon breakthrough infections,  
52 virus replication in the respiratory tract is approximately four- to six-fold reduced compared to  
53 unvaccinated and virus shedding seems to be shorter in duration<sup>14,19</sup>. Importantly, Public Health  
54 England reported that after the first dose of an mRNA (Comirnaty®) or viral vector vaccine (Vaxzevria®)  
55 the likelihood of household transmission drops by 40-50%<sup>20</sup>. On one hand, these observations  
56 underline that the current vaccination campaigns can end the pandemic phase by reducing the basic  
57 reproduction number below 1. On the other hand, however, it also demonstrates that transmission is  
58 still possible by vaccinated individuals posing a risk to vulnerable communities.

59 While the currently approved vaccines induce systemic immune responses, they probably do not evoke  
60 mucosal immunity in form of mucosal, secretory immunoglobulin A (IgA) or tissue-resident memory T  
61 cells ( $T_{RM}$ ). Secretory, polymeric IgA can neutralize incoming viral particles at the mucosal surface  
62 before infection of epithelial cells takes place, which is important for an optimal protection against  
63 respiratory virus infections<sup>21–23</sup>. Furthermore, IgA enables specific effector functions by cross-linking  
64 the Fc $\alpha$ -receptor, and polymeric forms of IgA might increase antibody avidity<sup>24</sup>. So far, the only  
65 licenced intranasal vaccines are live-attenuated influenza vaccines (LAIV). Nasal IgA contributes to the  
66 efficacy of LAIV in children<sup>25</sup> and also correlates with protection in experimental human challenge  
67 studies<sup>26</sup>. Importantly, local antigen deposition by mucosal vaccination routes is key for an induction  
68 of mucosal IgA as shown in humans<sup>24,27–29</sup> and animal models<sup>30–32</sup>. While IgA can be effectively induced  
69 by intranasal delivery of protein-based vaccines, an efficient induction of respiratory CD8<sup>+</sup>  $T_{RM}$  usually  
70 requires local antigen production in the mucosa followed by major histocompatibility complex-I-  
71 mediated peptide-presentation by stromal and, most importantly, by migratory CD103<sup>+</sup> dendritic cells  
72<sup>33</sup>. CD8<sup>+</sup>  $T_{RM}$  localize within the respiratory epithelium or the airways and can respond immediately in  
73 case of secondary infections. In contrast to circulatory T cell memory phenotypes like central memory  
74 ( $T_{CM}$ ), effector-memory ( $T_{EM}$ ), or effector T cells ( $T_{EFF}$ ),  $T_{RM}$  do not significantly recirculate<sup>34,35</sup>. Thus, one

75 feature of T<sub>RM</sub> is the direct localization at barrier tissues, which makes a time-consuming migration into  
76 the inflamed lung redundant. A second remarkable characteristic is the ability to exert innate and  
77 adaptive functions within a few hours after secondary infection<sup>36,37</sup>, in part due to the storage of ready-  
78 made mRNAs encoding cytokines like IFN $\gamma$  at steady state<sup>38,39</sup>. Altogether, these unique features of  
79 mucosal immune responses enable an immediate and effective countermeasure against pulmonary  
80 infections as described for flu<sup>40,41</sup>, respiratory syncytial virus (RSV)<sup>42</sup>, and *Mycobacterium tuberculosis*  
81<sup>43,44</sup>. The great majority of these findings were generated in animal models, partly due to the invasive  
82 nature of bronchoalveolar lavages (BAL) and biopsy sampling. However, small experimental human  
83 challenge studies started to look precisely at the role of mucosal immunity against respiratory viruses  
84<sup>45,46</sup>.

85 A few preclinical studies investigated intranasal SARS-CoV-2 vaccines so far. In a series of publications,  
86 one group reported protective efficacy of a one shot vaccination with an chimpanzee adenoviral vector  
87 (ChAd) vaccine encoding for the spike protein in mice, hamsters, and rhesus macaques<sup>47-49</sup>.  
88 Importantly, van Doremalen et al. have shown that intramuscular ChAd vaccination prevents  
89 pneumonia in macaques but allow for virus replication in the upper respiratory tract<sup>50</sup>. However,  
90 administered intranasally, the vaccine attenuated nasal virus replication more efficiently<sup>51</sup>. It is  
91 important to investigate intranasal vaccine candidates not only as standalone modality but also in the  
92 context of pre-existing immunity induced by a previous vaccination. On one hand, this is important  
93 due to the broad employment SARS-CoV-2 vaccines in recent vaccination campaigns. On the other  
94 hand, first clinical data point towards suboptimal immunogenicity of solely intranasal vaccinations  
95 against SARS-CoV-2 in humans without pre-existing immunity, but also provides evidence for robust  
96 immunity after heterologous prime-boost vaccinations<sup>52,53</sup>.

97 Here we demonstrate that a systemic DNA or mRNA prime followed by an intranasal boost with an  
98 adenoviral serotype 5 vector (Ad5) enables a comprehensive systemic and local T cell immunity as well  
99 as substantial mucosal neutralization of SARS-CoV-2 VOCs. Concomitantly, the mucosal boost

100 strategies led to an efficient control of virus replication after experimental infection comparable to  
101 homologous systemic immunizations.

## 102 **Results**

### 103 **A systemic DNA prime significantly increases the mucosal immunogenicity of an intranasal** 104 **adenoviral vector vaccine**

105 In this first part of our study, we evaluated the immunogenicity of mucosally applied viral vector  
106 vaccines as a single shot vaccine or as a booster after an intramuscular DNA prime immunization. To  
107 this end, codon-optimized sequences encoding the full-length S and nucleocapsid (N) proteins of SARS-  
108 CoV-2 were inserted into pVax-1 expression plasmids and into replication-deficient adenoviral vector  
109 vaccines based on serotype 5 (Ad5) or serotype 19a (Ad19a). BALB/c mice were immunized intranasally  
110 with the Ad5- or Ad-19a-based vaccines either without prior treatment or four weeks after an  
111 intramuscular DNA immunization with S- and N-encoding plasmids (Fig. 1 A). Two weeks later, SARS-  
112 CoV-2 specific antibody responses were analysed in serum and BAL, whereas the local and systemic T  
113 cell responses were determined in lungs and spleens, respectively.

114 In our flow cytometric assay<sup>54</sup>, spike-specific IgG, IgG1, and IgG2a could be easily detected in serum  
115 and BAL of animals treated with the prime-boost strategies, while antibodies in the BAL after a single  
116 dose of Ad19a or Ad5 were almost absent (Fig. 1 B-D). Comparing the two adenoviral vectors as booster  
117 vaccines, the serotype 5 induced significant higher levels of S-specific antibodies in the BAL, although  
118 the antibody levels in the sera were comparable for the both groups. A predominant polarisation of  
119 the antibody response towards either IgG1 or IgG2 is not indicated for any vaccine group (Fig. 1 C and  
120 D). Similar trends were also observed for N-specific antibody levels in sera and BALs (Fig. S1). In line  
121 with the amount of S-binding antibodies, profound virus neutralization was detected in sera and BAL  
122 samples from the groups DNA-Ad5 and DNA-Ad19a, while Ad5 or Ad19a alone did not induce  
123 significant levels of neutralizing antibodies (Fig. 1 E). Given the differences in the local antibody levels,  
124 the IgA response in the BAL towards specific domains of the S protein were analysed in more detail by

125 ELISA (Fig. 2 A-C). These results confirmed that intranasal applications of Ad5-based vectors induce  
126 higher S-specific IgA levels than Ad19a-based vectors and these responses benefit from a systemic DNA  
127 prime. Furthermore, the vaccine-induced antibodies were directed against S1 including the receptor-  
128 binding domain (RBD) as well as against the S2 domain of the spike protein (Fig. 2 A-C).

129 Next, we assessed the induction of cellular immune responses in the lung by the different vaccination  
130 schemes. Intravascular staining (iv-labeling) <sup>55</sup> was used to differentiate between circulating T cells  
131 present in the lung endothelium during sampling (iv-) and T<sub>RM</sub> (iv+). Since specific MHC-I multimers  
132 were not available at the time of this study, antigen-experienced cells were identified by the expression  
133 of CD44 (gating strategy shown in Fig. S2). Similar to the humoral responses, CD44<sup>+</sup> CD8<sup>+</sup> T cells in the  
134 lung were most efficiently induced by the DNA-Ad5 scheme, although all vaccinated animals mounted  
135 vaccine-induced cellular responses (Fig. 3 A). The vast majority of lung CD8<sup>+</sup> T cells were protected  
136 from the iv-labeling in all groups, and the most prominent T<sub>RM</sub> phenotype was CD103<sup>+</sup>CD69<sup>+</sup> (Fig. 3 B).  
137 Antigen-specific CD4<sup>+</sup> and CD8<sup>+</sup> T cells were identified by ex vivo restimulation with peptide pools  
138 covering major parts of S and the complete N protein, respectively, followed by intracellular staining  
139 of accumulated cytokines (gating strategy in Fig. S3). The highest percentages of S-reactive CD8<sup>+</sup> T cells  
140 were detected in the lungs of DNA-Ad5 treated animals with the majority of them predominantly  
141 producing IFN $\gamma$  (Fig. 4 A). Substantial numbers of this cell population were also present after the single  
142 shot vaccination with Ad5 reaching comparable levels to the ones of DNA-Ad19a treated animals.  
143 Differences in the percentages of CD8<sup>+</sup> T cells expressing IL-2 or TNF $\alpha$  were less pronounced, and  
144 polyfunctional T cells positive for all four analytes including the degranulation marker CD107a were  
145 rarely found in all animals. In contrast, significantly elevated percentages of CD8<sup>+</sup> T cells producing IFN $\gamma$   
146 or TNF $\alpha$  as well as polyfunctional CD8<sup>+</sup> T cells were detected in the spleens of DNA-Ad19a treated  
147 animals (Fig. 4 C). Albeit at overall lower frequencies, the same observation was made for N-reactive  
148 CD8<sup>+</sup> T cells in lungs and spleens (Fig. S4 A and C). Strong S- and N-specific CD4<sup>+</sup> T cell responses were  
149 detected in all animals that received a prime-boost vaccination (Fig. 4 and Fig. S4). In contrast to the  
150 CD8<sup>+</sup> T cells, the majority of the CD4<sup>+</sup> T cells were polyfunctional indicated by the simultaneous

151 expression of IFN $\gamma$ , TNF $\alpha$  and IL-2. Again, immunization with the Ad19a-based vectors resulted in  
152 higher systemic responses measured in the spleen, whereas the mucosal response in the lung was  
153 more pronounced after delivery of Ad5-based vectors (Fig. 4 C and D, Fig. S4 C and D).

154 Taken together, Ad5 proved a higher immunogenicity as mucosal vaccine vector compared to Ad19a  
155 and resulted in strong cellular and humoral immune responses against SARS-CoV-2 antigens if  
156 combined with an intramuscular DNA prime immunization.

157 **An intranasal boost following mRNA vaccination potentiates mucosal antibody responses with**  
158 **pronounced neutralization breadth**

159 Since mRNA vaccines are currently in use for mass vaccination campaigns in many countries, we  
160 wanted to compare the differential effects of a DNA or mRNA prime on the immunogenicity of a  
161 mucosal booster. Therefore, the previously described DNA-Ad5 scheme was compared to an mRNA  
162 prime (Comirnaty<sup>®</sup>, Biontech/Pfizer) followed by an intranasal Ad5 boost (RNA-Ad5). Moreover, two  
163 vaccine groups that received two intramuscular injections with either mRNA (2x RNA) or an adenoviral  
164 vector (2x Ad5) reflecting current SARS-CoV-2 vaccination strategies were included (Fig. 5 A). These  
165 experiments were performed in C57BL/6 mice to allow correlations to efficacy data in K18-hACE2 mice.

166 Four weeks after the boost immunization, all vaccinated animals reached high levels of anti-S IgG in  
167 the serum (Fig. 5 B and Fig. S5). However, the anti-S IgG levels after the homologous RNA vaccination  
168 were significantly higher than in all other groups. Interestingly, this order does not reflect the anti-S  
169 response measured four weeks after the prime immunization. Here, the intramuscular injection of Ad5  
170 induced the highest antibody levels, most probably by inducing more potent IgG2a responses than the  
171 RNA vaccine (Fig. S6). Contrary, the IgG levels detected in BALs were higher in the groups receiving the  
172 intranasal Ad5 boost vaccination (Fig. 5 B). Additionally, significantly increased local IgA antibody levels  
173 could be detected for both groups in a RBD-specific ELISA (Fig. 5 C). On a functional level, the higher  
174 amounts of RBD-specific antibodies were mirrored by higher neutralizing capacities in the BALs of the  
175 groups DNA-Ad5 or RNA-Ad5 (Fig. 5 D). Interestingly, the high amount of neutralizing antibodies in the

176 sera were not significantly different among the vaccine groups independent of the route of the boost  
177 immunization.

178 Since mucosal antibodies might be most important for preventing an initial infection and thereby  
179 transmission, we evaluated the protective capacity against SARS-CoV-2 VOCs in pseudotype-based  
180 virus neutralization assays (Fig. 6). Here, the most robust and broadest responses were detected in the  
181 BALs of RNA-Ad5 treated animals with decreasing neutralizing potencies against spike proteins from  
182 SARS-CoV-2 lineages B.1.1.7 (alpha variant)/P.1 (gamma variant) to B.1.351 (beta variant), and finally  
183 B.1.617.2 (delta variant). Interestingly, the DNA-Ad5 scheme resulted in comparable IC75 titres against  
184 alpha and delta as RNA-Ad5, but was less potent against the beta variant. This might reflect the  
185 different nature of the encoded S protein sequences. Finally, the solely systemic vaccination schedules  
186 provoked 4 - 32-fold lower titres of mucosal neutralization against alpha, beta, and gamma, whereas  
187 no neutralization of delta spike-pseudotyped reporter virus could be observed.

188 **Lung-resident memory T cells can be efficiently established by a mucosal boost but not by**  
189 **conventional mRNA vaccination**

190 Next, we assessed the induction of systemic and resident T cell memory. Antigen-experienced CD44<sup>+</sup>  
191 CD8<sup>+</sup> T cells isolated from lung tissue were quantitatively most pronounced in the 2x RNA group (Fig.  
192 7 B). However, by analysing the contribution of tissue-resident (iv-) and vascular (iv+) compartments,  
193 a more complex picture emerged. The groups that received two systemic immunizations almost  
194 exclusively mounted circulating T cell memory (>95% iv+; Fig. 7 A and B) and consistent to this, the  
195 predominant memory phenotypes were T<sub>EFF</sub>, T<sub>EM</sub>, and T<sub>CM</sub> (Fig. 7 C). CD103<sup>+</sup>CD69<sup>+</sup> T<sub>RM</sub> were not  
196 established in the lungs of these animals. In complete contrast, the DNA-Ad5 immunized animals  
197 displayed mostly T<sub>RM</sub> but were lacking substantial numbers of circulating memory cells. Importantly,  
198 the RNA-Ad5 strategy induced the most comprehensive T cell memory consisting of both circulating  
199 subsets and CD103<sup>+</sup>CD69<sup>+</sup> T cells in the lung.



200 The analysis of spike-specific, cytokine producing CD8<sup>+</sup> T cells showed a similar compartmentalization.  
201 Although the overall numbers of CD107a<sup>+</sup>, IFN $\gamma$ <sup>+</sup>, and TNF $\alpha$ <sup>+</sup> CD8<sup>+</sup> T cells were highest in the lungs of  
202 the 2x RNA group, these cells were almost exclusively found in the vascular compartment (iv-labelled,  
203 Fig. 8 A-C). The same is true for the homologous immunization with Ad5, albeit reaching much lower  
204 percentages of reactive cells. In line with the phenotypic analyses, RNA-Ad5 induced both systemic  
205 and local T cell responses, whereas DNA-Ad5 provoked mainly T<sub>RM</sub>. The trends observed for CD8<sup>+</sup> T cell  
206 responses in the iv-labelled lung population were largely mirrored by the splenic responses (Fig. 8 D),  
207 further underlining that the former population reflects circulating T cells present in the lung  
208 vasculature at the time of sampling. Spike-specific, tissue-resident CD4<sup>+</sup> T cell responses were also  
209 effectively established by the mucosal boost strategies (Fig. 9 A and B) and systemic CD4<sup>+</sup> T cells in the  
210 spleen were induced by all vaccine schedules with two RNA shots being the most effective strategy  
211 (Fig. 9 D).

212 In conclusion, only intranasal vaccinations schedules were able to induce profound mucosal immunity  
213 in the respiratory tract consisting of neutralizing IgG, IgA, and lung T<sub>RM</sub>. Compared to DNA-Ad5, the  
214 RNA-Ad5 strategy provoked a more efficient neutralization of VOCs and established a comprehensive  
215 T cell immunity consisting of both T<sub>RM</sub> and circulatory T cells.

## 216 **Systemic and mucosal vaccine schedules effectively protect from experimental SARS-CoV-2 infection**

217 In order to assess the protective efficacy of the vaccination strategies, human ACE2 transgenic mice  
218 (K18-hACE2) were immunized as described before and challenged four weeks after the boost  
219 immunization with 9x10<sup>3</sup> FFU of the SARS-CoV-2 strain BavPat1 as previously described<sup>56</sup>. Since the 2x  
220 Ad5 immunization was less immunogenic than the 2x RNA immunization, this group was replaced by  
221 another 2x Ad vaccination regime consisting of an intramuscular Ad19a prime followed by the  
222 established intranasal Ad5 boost (Fig. 10 A). Seven out of eight unvaccinated control animals reached  
223 humane endpoints at day five indicating a severe and lethal course of the disease (Fig. 10 B). They  
224 presented weight loss starting at day four post-infection with a concomitant increase of clinical signs

225 (Fig. 10 C and D). In contrast, all vaccinated groups were largely protected from weight loss, clinical  
226 signs of disease, and mortality (Fig. 10 B-D). High levels of viral RNA in lung homogenates and BAL fluids  
227 were only detected in unvaccinated animals indicating efficient viral replication, while from the  
228 vaccinated animals only two of the 2x RNA group had viral RNA copy numbers in the lung above the  
229 detection limit (Fig. 10 E). Similarly, infectious virus was retrieved from the lungs of unvaccinated  
230 animals but not from the immunized groups (Fig. 10 F). Due to the nature of this challenge model, high  
231 viral RNA copy numbers were also detected in the brains of naïve animals (Fig. S7). Although viral RNA  
232 was still detectable in the majority of the vaccinated animals, the copy numbers were reduced by 4-5  
233 logs, and no significant differences among the vaccine groups could be seen.

234 Taken together, the mucosal boost strategies were able to fully prevent mortality and symptomatic  
235 disease upon experimental SARS-CoV-2 infection. The protective efficacy was equal to the current  
236 approved vaccination regimen consisting of two intramuscular injections of Comirnaty®.

## 237 **Discussion**

238 The SARS-CoV-2 pandemic had and still has a deep impact on social, economic, and healthcare aspects  
239 of the world community. As a reaction, academic institutions, biotech companies, and regulatory  
240 agencies released safe and effective vaccines in an unprecedented speed. While early in the pandemic  
241 the vaccine efficacies of the respective vaccine schedules were in focus, the interest now shifts towards  
242 investigating immunogenicity and efficacy of mixed modality vaccinations, the maintenance of long-  
243 term immunity, and the protection against emerging variants. So far, the heterologous combination of  
244 different vaccine modalities is mostly connected to a superior immunogenicity in preclinical<sup>57,58</sup> and  
245 clinical studies<sup>59-62</sup>. As now most countries with progressed vaccination campaigns discuss the  
246 employment of booster vaccinations, a possible next step might be the implementation of mucosal  
247 immunizations in order to harness the full potential of mucosal immunity at the entry port of SARS-  
248 CoV-2 infections.

249 To this end, the current study determined the immunogenicity and protective efficacy of mucosal  
250 boost vaccination with adenoviral vectors after systemic prime immunizations with a DNA vaccine or  
251 an mRNA vaccine that is part of the current vaccine campaigns. The results clearly prove a potent  
252 induction of mucosal immune responses by these heterologous strategies not seen after purely  
253 systemic immunization schedules. Concomitantly, we observed comparable protective efficacies upon  
254 experimental infection among systemic immunization schedules and the heterologous mucosal boost  
255 strategies. These results should encourage the exploitation of mucosal booster immunizations as a  
256 non-traumatic vaccination modality able to induce strong mucosal immunity in addition to systemic  
257 responses. Although not discernible in the present study, this front-line immunity might further inhibit  
258 breakthrough infections and transmission risk.

259 In the first part of the present study, we confirmed that a systemic prime with a DNA vaccine  
260 potentiates the immunogenicity of mucosally applied adenoviral vector vaccines <sup>63</sup>. Most probably,  
261 systemic memory cells induced by the priming expand during the recall response and are then  
262 recruited to the mucosal site to differentiate into tissue-resident memory cells as reported for T<sub>RM</sub> in  
263 the female reproductive tract <sup>64</sup>. This is an important finding since it clearly proves the suitability to  
264 implement mucosal immunizations into current SARS-CoV-2 vaccination schedules. Although  
265 preclinical studies imply significant protection against SARS-CoV-2 in mice, hamsters, ferrets, and non-  
266 human primates after one intranasal vaccination with a adenoviral vector vaccines <sup>47-49,51,65</sup>, the first  
267 reports from a human clinical trial with an intranasal Ad5-based SARS-CoV-2 vaccine, Altimmune's  
268 AdCOVID, were disappointing and the development was discontinued <sup>52</sup>. Although safe and well  
269 tolerated, the vaccine did not demonstrate sufficient immunogenicity after one or two intranasal doses  
270 in previously unvaccinated individuals. The data from a very recent clinical phase I trial underline these  
271 findings by providing that serum antibody levels were lower after two intranasal doses of an Ad5-based  
272 SARS-CoV-2 vaccine than after one single intramuscular injection <sup>53</sup>. However, the combination of an  
273 mucosal booster immunization with an intramuscular prime resulted in the highest levels of  
274 neutralising antibodies reported in that clinical trial. Unfortunately, mucosal immune responses were

275 not assessed. These observations might support our notion of the potential need of pre-existing  
276 memory cells to maximize the immunogenicity of an intranasal immunization. While this might seem  
277 to complicate the use of nasal vaccines at first sight, one has to keep in mind that mass vaccination  
278 campaigns currently employ intramuscular immunizations in large parts of the community. This will  
279 finally result in a balanced response between systemic and mucosal immunity.

280 In most mucosal parameters observed, Ad19a was less immunogenic compared to Ad5, whereas  
281 systemic responses, especially CD4<sup>+</sup> T cell responses, were more efficiently induced. We reported this  
282 trend before and speculate that different tropisms of the viral vectors might account for that: Ad5  
283 enters cells via binding to the coxsackie-and-adenovirus receptor (CAR), while Ad19a binds sialic acids  
284 and CD46 as entry receptors <sup>66-69</sup>. Since these molecules are differentially expressed on stromal and  
285 immune cells, this might be one aspect explaining the different local and systemic immune profiles.

286 In the second part of the present study, the impact of the systemic priming modality (RNA/DNA) on  
287 the immunogenicity and efficacy of intranasal boost vaccinations with Ad5 was investigated and  
288 compared to two systemic immunizations with Ad5 or RNA. Humoral responses in the serum were  
289 largely comparable in all groups with the exception that two doses Ad5 provoked weaker responses.  
290 It is tempting to speculate that anti-vector immunity induced by the primary immunization might have  
291 dampened the effect of the homologous booster. This mechanism is also discussed in the context of  
292 the lower vaccine efficacy in humans reported with two standard doses Vaxzevria<sup>®</sup> (ChAdOx1)  
293 compared to the low dose-standard dose schedule <sup>5</sup>.

294 Mucosal antibody levels were higher in the groups having received a mucosal boost compared to the  
295 repeated systemic vaccination regimens. In regard to the levels of mucosal IgG, this trend was less  
296 pronounced as for mucosal IgA levels, presumably because serum IgG can be transudated into the  
297 respiratory lumen, whereas IgA is more stringently connected to a local immune reaction. Most  
298 importantly, the increased antibody responses in the mucosa also translated into more efficient virus  
299 neutralization by BAL samples. Only BAL samples from groups with mucosal vaccinations displayed

300 effective neutralization of all tested VOCs. Although definitive evidence is currently missing, mucosal  
301 virus neutralization might be key to suppress initial infections with SARS-CoV-2 and therefore minimize  
302 the risk of transmission to and by vaccinees. Interestingly, we observed distinct neutralization profiles  
303 between the DNA-Ad5 and RNA-Ad5 schemes probably originating from the use of different spike  
304 antigens. Thus, it is important to investigate the role of the prefusion conformation stabilization<sup>70</sup>  
305 regarding neutralization profiles in more detail.

306 An important advantage of intranasally administered genetic vaccines is the induction of T<sub>RM</sub> in the  
307 respiratory tract. In the present study, tissue-resident memory was exclusively established by mucosal  
308 vaccinations. This is congruent with published research showing that local antigen expression is  
309 essential for the development of respiratory T<sub>RM</sub><sup>30,32,40</sup>. Moreover, in combination with a mucosal  
310 boost, a priming immunization with RNA provoked a broader cellular immunity compared to a DNA  
311 prime consisting of not only T<sub>RM</sub> in the lung but also of significant numbers of circulating memory T  
312 cells. We speculate that such comprehensive T cell immunity is more effective against breakthrough  
313 infections than having only circulating or only resident T cells. Although the chosen challenge model in  
314 K18-hACE2 mice did not allow to decipher different degrees of protection, it clearly demonstrates that  
315 heterologous prime-boost vaccinations with an intranasal component are at least as protective as the  
316 currently licensed vaccine schedules.

317 To further investigate potential advantages of mucosal immune responses, upcoming studies must  
318 mimic the settings more closely that likely contribute to breakthrough infections in vaccinated  
319 individuals: age<sup>71</sup>, comorbidities<sup>72,73</sup>, waning immunity, and infection with less neutralization-sensitive  
320 variants like B.1.617.2<sup>12-18</sup>. However, experimental human challenge studies with a small number of  
321 participants might also illuminate this topic similar to challenge studies previously performed in the  
322 context of RSV<sup>45,46</sup> or Influenza<sup>74,75</sup>.

323 Absolute or mechanistic correlates of protection against SARS-CoV-2 are not yet determined, although  
324 neutralizing antibody responses in sera were recently described to be predictive of protection against

325 symptomatic infections <sup>76,77</sup>. However, limiting the initial infection rate by mucosal IgA and an early  
326 control of viral replication by local CD8<sup>+</sup> T<sub>RM</sub> would add another layer of protection, which may be  
327 underestimated so far. Furthermore, the rapid inhibition of local replication may result in reduced  
328 levels of pro-inflammatory cytokines that partially contribute to tissue damage and severe disease  
329 progression <sup>78</sup>. In face of the encouraging results from the mixed vaccine regimens using RNA vaccine  
330 first followed by adenoviral vector vaccines <sup>59-62</sup>, it might be worthy to utilize an intranasal application  
331 for the viral vector boost immunization. This atraumatic, non-invasive application might also reduce  
332 the systemic side effects reported for the viral vector vaccines <sup>79,80</sup>.

333 Finally, we demonstrated that the heterologous RNA prime/intranasal Ad5 boost immunization is not  
334 inferior to the common gold standard of two intramuscular RNA immunizations in regard to efficacy  
335 and additionally results in an unmatched mucosal immune response to SARS-CoV-2. Thus, this study  
336 provides the basis to pursue further efficacy studies in non-human primate models or even initiate  
337 clinical phase I studies using the currently available vaccines.

## 338 **Methods**

### 339 Vaccines

340 Codon-optimized sequences for the N or the spike S protein of SARS-CoV-2 were cloned into the pVAX1  
341 expression plasmid (ThermoFisher) optimized for DNA vaccinations referred to as pVAX1-SARS2-N and  
342 pVAX1-SARS2-S <sup>81</sup>. The encoded S protein is the non-stabilized wildtype protein and based on the  
343 sequence of the initial Wuhan isolate (NCBI Reference Sequence: NC\_045512.2). Replication-deficient  
344 ( $\Delta E1\Delta E3$ ) adenoviral vector vaccines based Ad5 or Ad19a/64 encoding the same antigens were  
345 produced as previously described <sup>82</sup> by Sirion Biotech (Martinsried, Germany). In both vector systems,  
346 antigen expression is initiated from a CMV-immediate/early-1-promoter and a bovine BGH  
347 polyadenylation signal provides transcription termination. The mRNA vaccine Comirnaty<sup>®</sup> encodes the  
348 stabilized prefusion S protein and is described elsewhere <sup>83</sup>.

349

350 Immunizations

351 Six to eight weeks old female BALB/cJrj or C57BL/6 mice were purchased from Janvier (Le Genest-  
352 Saint-Isle, France) and housed in individually ventilated cages in accordance with German law and  
353 institutional guidelines. The study was approved by an external ethics committee authorized by the  
354 Government of Lower Franconia and performed under the project license AZ 55.2.2-2532-2-1179. The  
355 research staff was trained in animal care and handling in accordance to the FELASA and GV-SOLAS  
356 guidelines. For intramuscular immunizations, inhalative isoflurane anaesthesia was applied and the  
357 vaccines were injected in a volume of 30 µl PBS in the *musculus gastrocnemius* of each hind leg. In case  
358 of DNA immunizations, the injection was followed by electroporation as described previously<sup>84</sup>. Under  
359 general anaesthesia (100 mg/kg ketamine and 15 mg/kg xylazine), intranasal immunizations were  
360 performed by slowly pipetting a volume of 50 µl into one nostril containing the final vaccine dose.  
361 Blood was sampled from the retro-orbital sinus under light anaesthesia with inhaled isoflurane. For  
362 sampling BAL fluids, mice were killed and the lungs were rinsed twice with 1 ml cold PBS through the  
363 cannulated trachea.

364 Antigen-specific antibody ELISA

365 Spike S1, S2, and RBD antibody responses were analysed by ELISA. To this end, ELISA plates were  
366 coated with 100 ng of the respective peptide (RBD peptide provided by Diarect GmbH, Freiburg; S1  
367 and S2 peptides kindly provided by Thomas Schumacher from Virion/Serion GmbH, Würzburg) in 100  
368 µl carbonate buffer (50 mM carbonate/bicarbonate, pH 9.6) per well over night at 4°C. Free binding  
369 sites were blocked with 5% skimmed milk in PBS-T (PBS containing 0.05% Tween-20) for 1h at RT. BAL  
370 samples were diluted in 2% skimmed milk in PBS-T and incubated on the plate for one hour at RT. After  
371 three washing steps with 200 µl PBS-T, HRP-coupled anti-mouse IgA (dilution 1:5,000, A90-103P, Bethyl  
372 Laboratories) detection antibodies were added for 1h at RT. Subsequently, the plates were washed  
373 seven times with PBS-T and after the addition of ECL solution, the signal was measured on a microplate  
374 luminometer (VICTOR X5, PerkinElmer).

375 FACS-based antibody analysis

376 A modified version of our previously published serological assay was used <sup>54</sup>, in which stably  
377 transduced HEK 293T cells express the antigen of interest. To analyse quantities of antigen-specific  
378 antibodies,  $5 \times 10^5$  HEK 293T cells producing SARS-CoV-2 spike or nucleocapsid were incubated for 20  
379 minutes at 4°C with the respective biological sample diluted in 100 µl FACS-PBS (PBS with 0.5% BSA  
380 and 1 mM sodium azide) to bind to spike protein on the surface, or in 100 µl permeabilization buffer  
381 (0.5% saponin in FACS-PBS) to bind to intracellular nucleocapsid protein. After washing with 200 µl  
382 buffer, specific antibodies were bound with polyclonal anti-mouse Ig-FITC (1:300, 4°C, 20 min  
383 incubation; BD Biosciences), anti-mouse IgG1-APC (1:300, clone X56), or anti-mouse IgG2a-FITC (1:300,  
384 clone R19-15, all BD Biosciences). After further washing, samples were measured on an AttuneNxt  
385 (ThermoFisher) and analysed using FlowJo software (Tree Star Inc.).

386 Virus neutralization assay

387 Serial dilutions of sera and BALs were incubated with 2000 PFU of an early SARS-CoV-2 isolate (GISAID  
388 EPI\_ISL\_406862\_Germany/BavPat1/2020) in 100 µl OptiPro medium supplemented with 1x GlutaMAX  
389 (both Gibco) for 1h at 37°C. Subsequently, the mixture was added onto a confluent monolayer of Vero  
390 E6 cells (seeded the day before at  $10^4$  cells per well in a 96-well plate). After 1h, the mixture was  
391 removed from the cells and 100 µl OptiPro medium supplemented with 1x GlutaMAX (both Gibco) was  
392 added. After 24h incubation at 37°C and 5% CO<sub>2</sub>, cells were fixed with 100 µl 4% paraformaldehyde for  
393 20 min at RT and permeabilized with 100 µl 0.5% Triton X-100 in PBS for 15min at RT. After a blocking  
394 step with 100 µl 5% skimmed milk in PBS for 1h at RT, cells were stained with purified immunoglobulins  
395 from a SARS-CoV-2 convalescent patient in 2% skimmed milk for 1h at 4°C. After three washing steps  
396 with 200 µl PBS, 100 µl of anti-human IgG FITC (1:200, 109-096-003, Jackson ImmunoResearch) were  
397 added diluted in 2% skimmed milk and incubated for 1h at 4°C in the dark. After another three washing  
398 steps with 200 µl PBS, plaques were counted with an ELISPOT reader (Cellular Technology limited)



399 BioSpot). Infected wells without serum were used as reference to determine the 75% plaque reduction  
400 neutralization titre (PRNT75).

#### 401 Pseudotype neutralization assay

402 Neutralization of various spike variants was assessed with the help of spike-pseudotyped simian  
403 immunodeficiency virus particles as described before<sup>85</sup>. For the production of pseudotyped reporter  
404 particles, HEK293T cells were transfected with the SIV-based self-inactivating vector encoding  
405 luciferase (pGAE-LucW), the SIV-based packaging plasmid (pAdSIV3), and the respective spike variant-  
406 encoding plasmid<sup>86-88</sup>. For this purpose,  $2 \times 10^7$  HEK293T cells were seeded the day before in a 175 cm<sup>2</sup>  
407 flask in Dulbecco's Modified Eagle's Medium (DMEM; Gibco) containing 10% FCS, 2 mM L-Glutamine,  
408 and 100 units/ml penicillin/streptomycin (D10 medium). The transfection mixture was prepared by  
409 mixing 20 µg of each plasmid with 180 µg polyethylenimine in 5 ml DMEM without additives. 15 min  
410 later, the mixture was added to the cells. After 4-8h incubation, the medium was exchanged to 25 ml  
411 DMEM containing 1.5% FCS, 2 mM L-Glutamine, and 100 units/ml penicillin/streptomycin. 72 h post-  
412 transfection, the supernatants containing the lentiviral particles were harvested, sterile filtrated (0.45  
413 µm membrane), and stored at -20°C. HEK293T-ACE2 cells stably expressing the human Angiotensin-  
414 converting enzyme 2 (ACE2) were transduced with the dilutions of the pseudotypes. The amount of  
415 lentiviral particles resulting in luciferase signals of  $2-10 \times 10^4$  RLU/s were used for the latter assay.

416 For the assessment of pseudotype neutralization, HEK293T-ACE2 cells were seeded at  $2 \times 10^4$  cells/well  
417 in 100 µl D10 in a 96well flat bottom plate. 24h later, 60 µl of serial dilutions of the BAL samples were  
418 incubated with 60 µl lentiviral particles for 1 h at 37°C. HEK293T cells were washed once with PBS and  
419 the particle-sample mix was added to the cells. 48 h later, medium was discarded and the cells lysed  
420 with 100 µl Bright Glo lysis buffer (Promega) for 15 min at 37°C. Three minutes later, after the addition  
421 of 25 µl Bright Glo substrate (Promega), the luciferase signal was assessed on a microplate  
422 luminometer (VICTOR X5, PerkinElmer). Neutralization titres are determined as the last reciprocal

423 dilution that inhibits more than 75% of the luciferase signal measured in positive controls (inhibitors  
424 concentration 75%, IC75).

#### 425 T cell assays

426 For the definition of circulatory and tissue-resident T cells, mice were injected with 3 µg anti-CD45-  
427 BV510 (clone 30-F11, Biolegend) intravenously and were euthanized three minutes later with an  
428 overdose of inhaled isoflurane. Spleens and lungs were harvested. The latter ones were cut into small  
429 pieces followed by incubation for 45 min at 37 °C with 500 units Collagenase D and 160 units DNase I  
430 in 2 ml R10 medium (RPMI 1640 supplemented with 10 % FCS, 2 mM L-Glutamine, 10 mM HEPES,  
431 50 µM β-mercaptoethanol and 1 % penicillin/streptomycin). Digested lung tissues and spleens were  
432 mashed through a 70 µm cell strainer before the single cell suspensions were subjected to an  
433 ammonium-chloride-potassium lysis. One million splenocytes or 20% of the total lung cell suspension  
434 were plated per well in a 96-well round-bottom plate for in vitro restimulation and phenotype assays.

435 For the restimulation, samples were incubated for 6 hours (or 24 hours in case of Fig. 8 und 9) in 200 µl  
436 R10 medium containing monensin (2 µM), anti-CD28 (1 µg/ml, eBioscience), anti-CD107a-FITC (clone  
437 eBio1D4B, eBioscience), and the respective SARS-CoV-2 peptide pool (0.6 nmol/peptide, S and N pools  
438 from Miltenyi Biotec, 130-126-701 and 130-126-699). Unstimulated samples were used for subtraction  
439 of background cytokine production. Cells were stained after the stimulation with anti-CD8a-Pacific blue  
440 (1:300, clone 53-6.7, BD Biosciences), anti-CD4-PerCP (1:2000, clone RM4-5, eBioscience) and Fixable  
441 Viability Dye eFluor® 780 (1:4000, eBioscience) in FACS-PBS for 20 min at 4°C. After fixation (2%  
442 paraformaldehyde, 20 min, 4°C) and permeabilization (0.5% saponin in FACS-PBS, 10 min, 4°C), cells  
443 were stained intracellularly with anti-IL-2-APC (1:300, clone JES6-5H4, BD Biosciences), anti-TNFα-  
444 PECy7 (1:300, clone MPG-XT22, BD Biosciences), and anti-IFNγ-PE (1:300, clone XMG1.2, eBioscience).  
445 The gating strategy is shown in Fig. S3.

446 For the phenotype analyses, cells were stained in FACS-PBS with anti-CD8-BV711 (1:300, clone 53-6.7,  
447 BioLegend), anti-CD4-SB600 (1:1000, clone RM4-5, BioLegend), anti-CD127-FITC (1:500, clone A7R34,

448 BioLegend), anti-CD69-PerCP-Cy5.5 (1:300, clone H1.2F3, BioLegend), anti-CD103-PE (1:200, clone 2E7,  
449 Invitrogen), anti-KLRG1-PE-Cy7 (1:300, clone 2F1, Invitrogen), anti-CD44-APC (1:5000, clone IM7,  
450 BioLegend), and Fixable Viability Dye eFluor® 780 (1:4000, eBioscience). Data were acquired on an  
451 AttuneNxt (ThermoFisher) or on a LSRII (BD Biosciences) and analysed using FlowJo™ software (Tree  
452 Star Inc.). The gating strategy is shown in Fig. S2.

#### 453 SARS-CoV-2 infection model

454 The infection experiments were approved by local authorities after review by an ethical commission  
455 (TVV 21/20). Eleven weeks old, female K18-hACE2 mice (Jackson Laboratory, Bar Harbor, USA) were  
456 immunized as described before and infected four weeks after the boost immunization intranasally with  
457  $9 \times 10^3$  focus-forming units (FFU) of the SARS-CoV-2 strain BavPat1 in a total volume of 50  $\mu$ l under light  
458 anaesthesia with inhaled isoflurane. Animals were monitored daily for body weight and clinical score.  
459 The following parameters were evaluated in the scoring system: weight loss and body posture (0-20  
460 points), general conditions including the appearance of fur and eye closure (0-20 points), reduced  
461 activity and general behaviour changes (0-20 points), and limb paralysis (0-20 points). Mice were  
462 euthanized at day 5 after infection or earlier if a cumulative clinical score of 20 or more was reached.  
463 After euthanasia, the lungs were filled with 800  $\mu$ l PBS and the left lung was tied off. The BAL of the  
464 right lung was taken and repeated with two more washes each with 400  $\mu$ l. The right lungs as well as  
465 the right hemispheres of the brains were homogenized in 1 ml PBS using a gentleMACS Octo  
466 Dissociator (Miltenyi Biotec) and viral RNA was isolated from 140  $\mu$ l cleared homogenate or BAL fluid  
467 using QIAamp Viral RNA Mini Kit (Qiagen). RT-qPCR reactions were performed using TaqMan® Fast  
468 Virus 1-Step Master Mix (ThermoFisher) and 5  $\mu$ l of isolated RNA as a template to detect a 132 bp  
469 sequence in the ORF1b/NSP14. Primer and probe sequences were as follows: forward primer, 3'-  
470 TGGGGYTTTACRGGTAACCT-5'; reverse primer, AACRCGCTTAACAAAGCACTC; probe, 3'-FAM-  
471 TAGTTGTGATGCWATCATGACTAG-TAMRA-5'. Synthetic SARS-CoV-2-RNA (Twist Bioscience) was used  
472 as a quantitative standard to obtain viral copy numbers<sup>89</sup>. For the detection of infectious virus in BAL  
473 and the lung, Vero E6 cells were seeded at  $2 \times 10^4$  cells/well in a 96-well plate in 200  $\mu$ l of D10 for

474 confluent monolayer 24 h prior to infection. After medium change to D10, a two-fold-serial dilution of  
475 BALs or lung homogenates were applied to the cells for 3 hours. After replacing the supernatant with  
476 overlay medium (DMEM with 1 % methyl cellulose, 2 % FBS and 1% penicillin/streptomycin), cells were  
477 incubated for further 27 hours. SARS-CoV-2 infected cells were visualized using SARS-CoV-2 S-protein  
478 specific immunochemistry staining with anti-SARS-CoV-2 spike glycoprotein S1 antibody (Abcam)<sup>90</sup>.

#### 479 Statistical analyses

480 Results are shown as mean  $\pm$  SEM or as median  $\pm$  interquartile range except it is described differently.  
481 Statistical analyses were performed with Prism 8.0 (GraphPad Software, Inc.). A p value of <0.05 was  
482 considered to be statistically significant. For reasons of clarity, significances are only shown among the  
483 vaccine groups.

#### 484 **Data availability**

485 All data are included in the manuscript or in the supplementary material.

#### 486 **Acknowledgements**

487 We would like to thank Drew Hannaman (Ichor Medical Systems, Inc.) for providing the TriGrid  
488 electrode array for DNA electroporation, Anne-Kathrin Donner for excellent technical assistance, and  
489 the group of Dr. Jasmin Fertey (Fraunhofer IZI, Leipzig, Germany) for providing viral stocks for mouse  
490 infections. Moreover, we kindly thank Thomas Schumacher (Virion/Serion GmbH, Würzburg,  
491 Germany) and Diarect GmbH (Freiburg, Germany) for providing the Spike peptides. The ELISPOT  
492 Analyzer was obtained with financial support from Fondation Dormeur, Vaduz.

493 This work was supported within the FOR-COVID project funded by the Bavarian State ministry for  
494 Science and the Arts. Further support was provided by B-FAST, a BMBF-funded project of the Netzwerk  
495 Universitätsmedizin (NaFoUniMedCovid19; FKZ: 01KX2021) and funds from the Deutsche  
496 Forschungsgemeinschaft (DFG) through the research training group RTG 2504 (project number:  
497 401821119). S.P. acknowledges funding by BMBF (01KI2006D, 01KI20328A, 01KI20396, 01KX2021), the

498 Ministry for Science and Culture of Lower Saxony (14-76103-184, MWK HZI COVID-19) DFG (PO 716/11-  
499 1, PO 716/14-1).

#### 500 **Author contributions**

501 D.L., T.G., K.Ü., and M.T. conceived and designed the study. D.L., J.F., J.W., A.V.A., V.E., N.U., L.I., A.S.,  
502 F.O., A.S.P., P.I., and K.F. collected the data. D.L., J.F., J.W., A.V.A., V.E., N.U., L.I., T.G., and M.T.  
503 performed the analysis. S.M.-S., A.C., A.E., M.H., S.P., C.P., T.W., and C.T. contributed critical reagents.  
504 D.L. and M.T. drafted the manuscript, which was then critically reviewed and approved by all co-  
505 authors.

#### 506 **Competing interests**

507 C.T. is founder and shareholder of SIRION Biotech GmbH. The other authors declare no competing  
508 interests.

#### 509 **Materials and Correspondence**

510 [Dennis.Lapuate@uk-erlangen.de](mailto:Dennis.Lapuate@uk-erlangen.de)

511 [Matthias.Tenbusch@fau.de](mailto:Matthias.Tenbusch@fau.de)

512

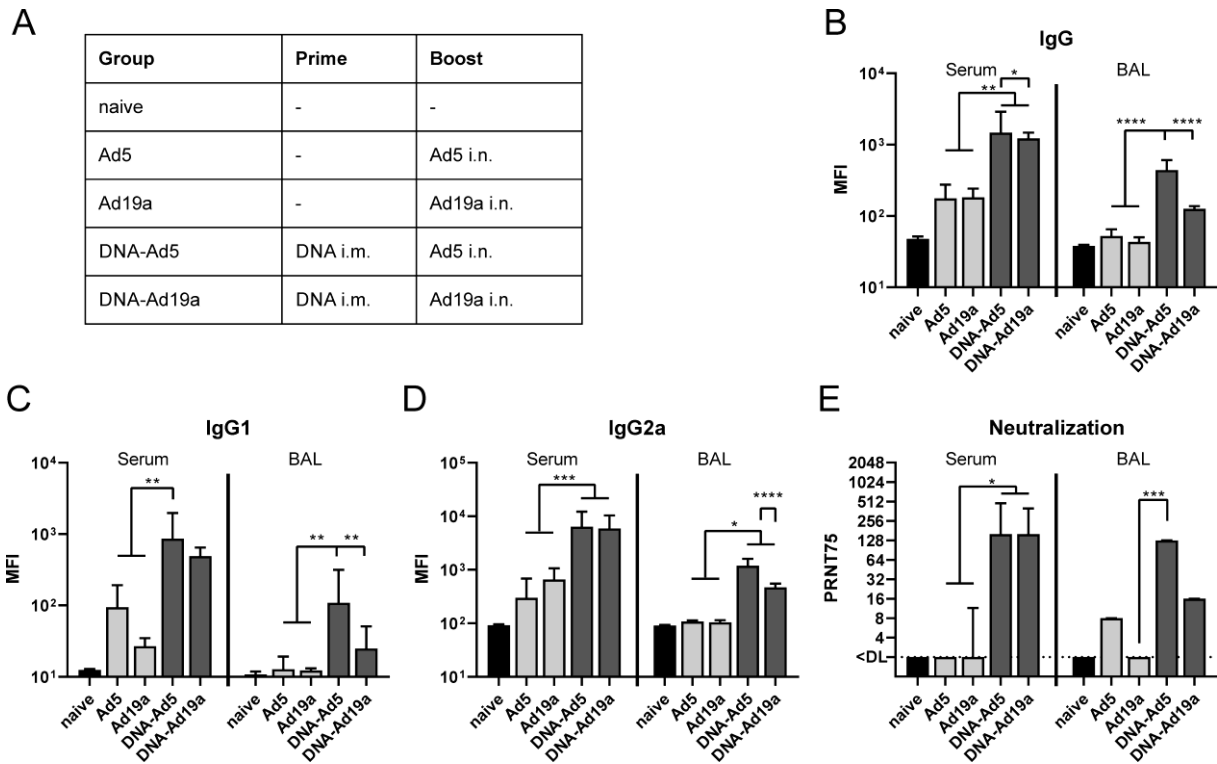

513

514 **Figure 1: Humoral responses after intranasal immunization with Ad5- or Ad19a-based viral vector**

515 **vaccines.** (A) BALB/c mice were immunized intranasally with Ad5- or Ad19a-based vectors encoding

516 the N and S protein of SARS-CoV-2 ( $2 \times 10^6$  infectious units per vector). Mice from the heterologous

517 prime-boost groups were primed four weeks before by intramuscular injection of N- and S-encoding

518 DNA plasmids (10  $\mu$ g per plasmid) followed by electroporation. Serum antibody responses were

519 analysed thirteen days and mucosal immune responses in the BALs fourteen days after the mucosal

520 immunization. Spike-specific IgG (B), IgG1 (C), and IgG2a (D) were assessed by a flow cytometric

521 approach (dilutions: sera 1:400, BAL 1:100). Plaque reduction neutralization titres (PRNT75) were

522 determined by in vitro neutralization assays (E). Bars represent group medians with interquartile

523 ranges; naive n=4; DNA-Ad5 n=5; other groups n=6. Data were analysed by one-way ANOVA followed

524 by Tukey's post test (B-D) or by Kruskal-Wallis test (one-way ANOVA) followed by Dunn's multiple

525 comparison test (E). Statistically significant differences were indicated only among the different

526 vaccine groups (\*,  $p < 0.05$ ; \*\*,  $p < 0.005$ ; \*\*\*,  $p < 0.0005$ ; \*\*\*\*,  $p < 0.0001$ ).

527

528

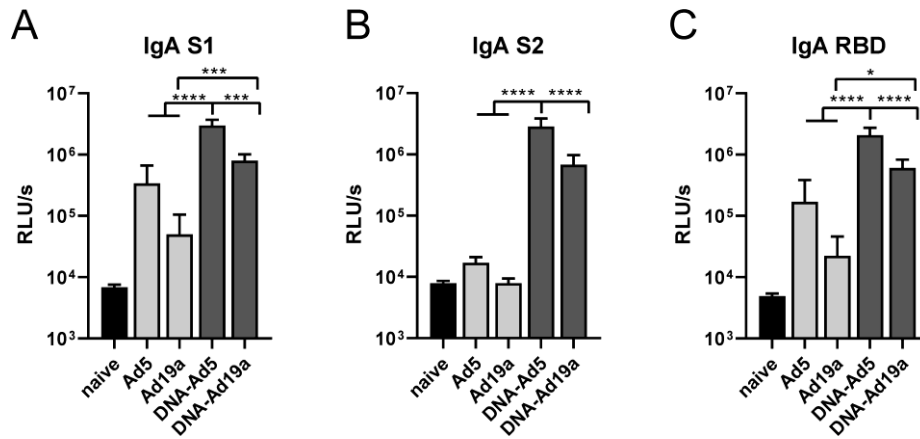

529

530 **Figure 2: Mucosal, Spike-specific IgA responses.** BALB/c mice were vaccinated according to Fig. 1 A.

531 BAL samples were tested for spike-specific IgA directed against the domains of S1 (A), S2 (B), or RBD

532 (C) by ELISA (dilution: 1:10). Bars represent group medians with interquartile ranges; naïve n=4; DNA-

533 Ad5 n=5; other groups n=6. Data were analysed by one-way ANOVA followed by Tukey's post test.

534 Statistically significant differences were indicated only among the different vaccine groups (\*,  $p < 0.05$ ;

535 \*\*,  $p < 0.005$ ; \*\*\*,  $p < 0.0005$ ; \*\*\*\*,  $p < 0.0001$ ).

536

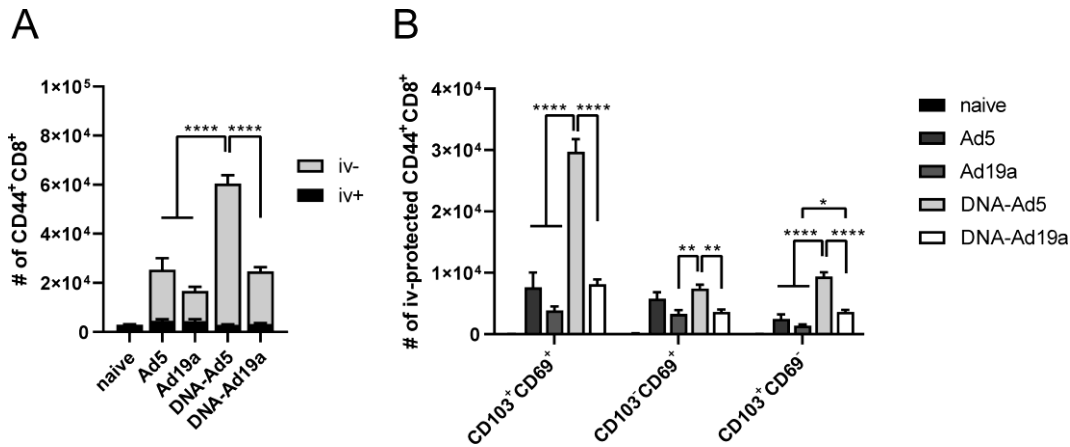

537

538 **Figure 3: Tissue-resident memory T cell subsets in the lung.** BALB/c mice were vaccinated according

539 to Fig. 1 A. In absence of suitable MHC-I multimers, antigen-experienced CD8<sup>+</sup> T cells were identified

540 by CD44 staining (A). Intravascular staining was used to differentiate between circulating (iv+) and

541 tissue-resident (iv-) memory cells. Tissue-resident phenotypes were assessed by staining for CD69

542 and/or CD103 within the iv-protected memory compartment (B). The gating strategy is shown in figure

543 S2. Bars represent group means with SEM; naïve n=4; DNA-Ad5 n=5; other groups n=6. Data were

544 analysed by one-way ANOVA followed by Tukey's multiple comparison test. Statistical significant

545 differences were indicated only among the different the vaccine groups (\*, p<0.05; \*\*, p<0.005; \*\*\*,

546 p<0.0005; \*\*\*\*, p<0.0001) and in case of (A) for the total CD44 population including iv-protected and

547 iv-labelled.



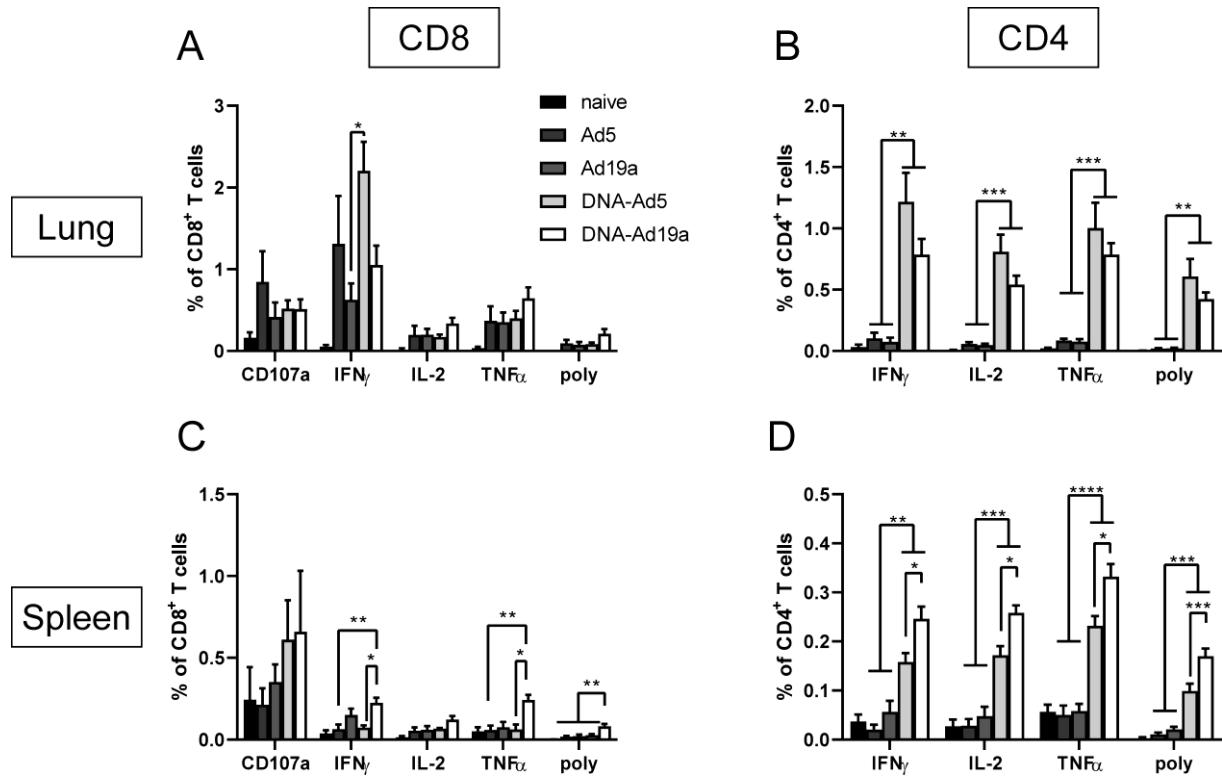

548

549

550 **Figure 4: Spike-specific T cell responses after intranasal immunization with Ad5- or Ad19a-based viral**  
 551 **vector vaccines.** BALB/c mice were vaccinated according to Fig. 1 A. Lung and spleen homogenates  
 552 were restimulated with peptide pools covering major parts of S and the responding CD8<sup>+</sup> (A and C) and  
 553 CD4<sup>+</sup> T cells (B and D) were identified by intracellular staining for accumulated cytokines or staining for  
 554 CD107a as degranulation marker. The gating strategy is shown in figure S3. Bars represent group  
 555 means with SEM; naive n=4; DNA-Ad5 n=5; other groups n=6. Data were analysed by one-way ANOVA  
 556 followed by Tukey's multiple comparison test. Statistically significant differences were indicated only  
 557 among the different vaccine groups (\*, p<0.05; \*\*, p<0.005; \*\*\*, p<0.0005; \*\*\*\*, p<0.0001). poly;  
 558 polyfunctional T cell population positive for all assessed markers.

559

560

561

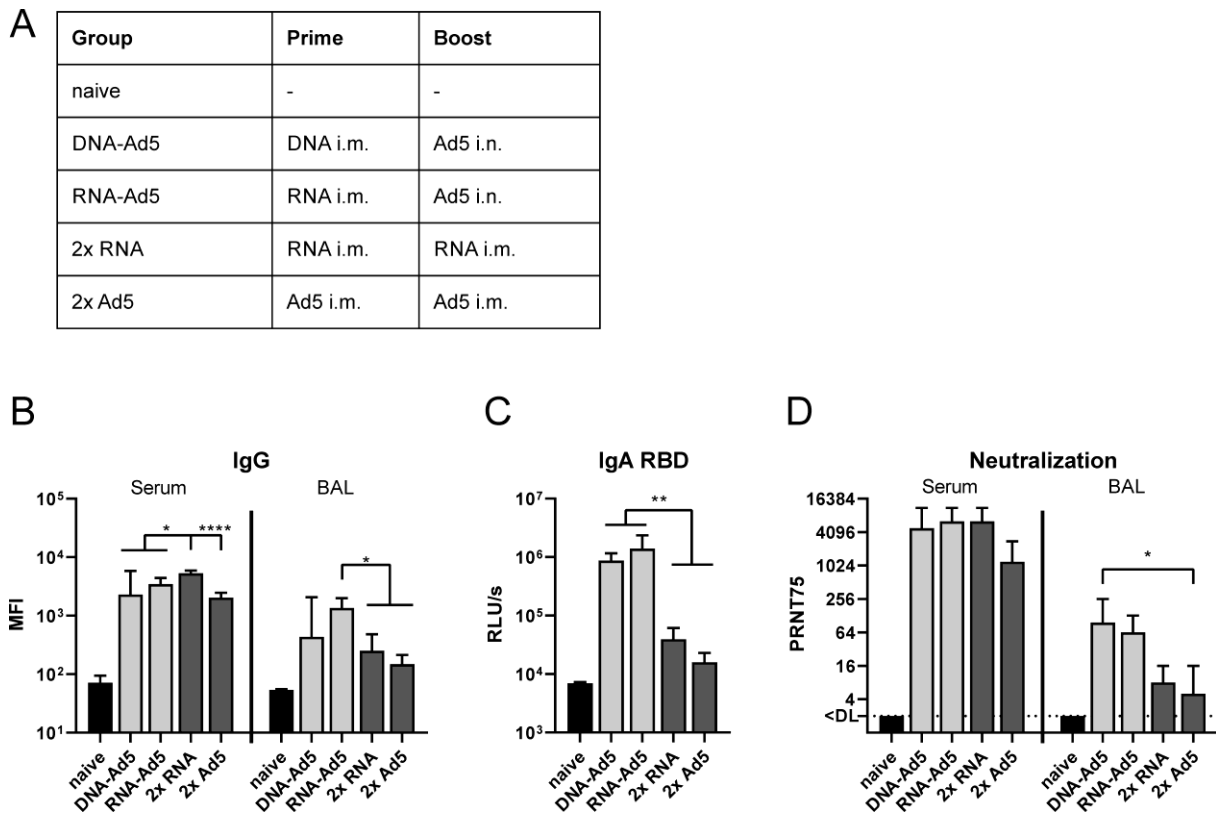

562

563 **Figure 5: Humoral responses after homologous or heterologous prime-boost vaccination.** (A)

564 C57BL/6 mice received an intramuscular prime immunization with the spike-encoding DNA (10 µg),

565 Ad5-S (10<sup>7</sup> infectious units), or the mRNA vaccine, Comirnaty® (1 µg). Mice from the heterologous

566 prime-boost groups were boosted four weeks later intranasally with Ad5-S (10<sup>7</sup> infectious units). The

567 homologous prime-boost groups received a second dose of mRNA (1 µg) or Ad5-S (10<sup>7</sup> infectious units)

568 intramuscularly. Serum antibody responses were analysed 21 days and mucosal immune responses

569 four weeks after the boost immunizations. Spike-specific IgG (B) were assessed by a flow cytometric

570 approach (dilutions: Sera 1:800, BAL 1:20). BAL samples were tested for spike-specific IgA directed

571 against RBD by ELISA (C). Plaque reduction neutralization titres (PRNT75) were determined by in vitro

572 neutralization assays (D). Bars represent group medians with interquartile ranges; sera all groups n=8;

573 BALs RNA-Ad5 n=7, other groups n=8. Data were analysed by one-way ANOVA followed by Tukey's

574 post test (B and C) or Kruskal-Wallis test (one-way ANOVA) followed by Dunn's multiple comparison

575 test (D). Statistically significant differences were indicated only among the different vaccine groups (\*,

576 p<0.05; \*\*, p<0.005; \*\*\*, p<0.0005).

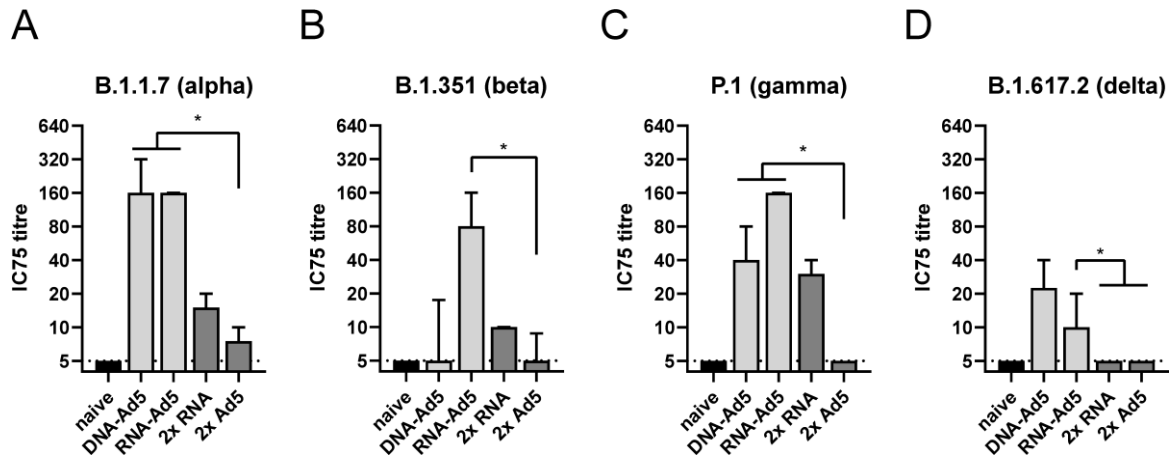

577

578 **Figure 6: Neutralization of SARS-CoV-2 variants.** C57BL/6 mice were vaccinated according to Fig. 5 A.

579 BAL samples were analysed by pseudotype neutralization assays for the neutralization of different

580 variants of concern (A-D). The IC<sub>75</sub> titre consists of the reciprocal value of the highest dilution able to

581 reduce the infectivity of the respective pseudotype by 75%. Bars represent group medians with

582 interquartile ranges; RNA-Ad5 n=7, other groups n=8. The dashed line indicates the lower limit of

583 detection. Data were analysed by Kruskal-Wallis test (one-way ANOVA) followed by Dunn's multiple

584 comparison. Statistically significant differences were indicated only among the different vaccine

585 groups (\*, p<0.05; \*\*, p<0.005; \*\*\*, p<0.0005).

586

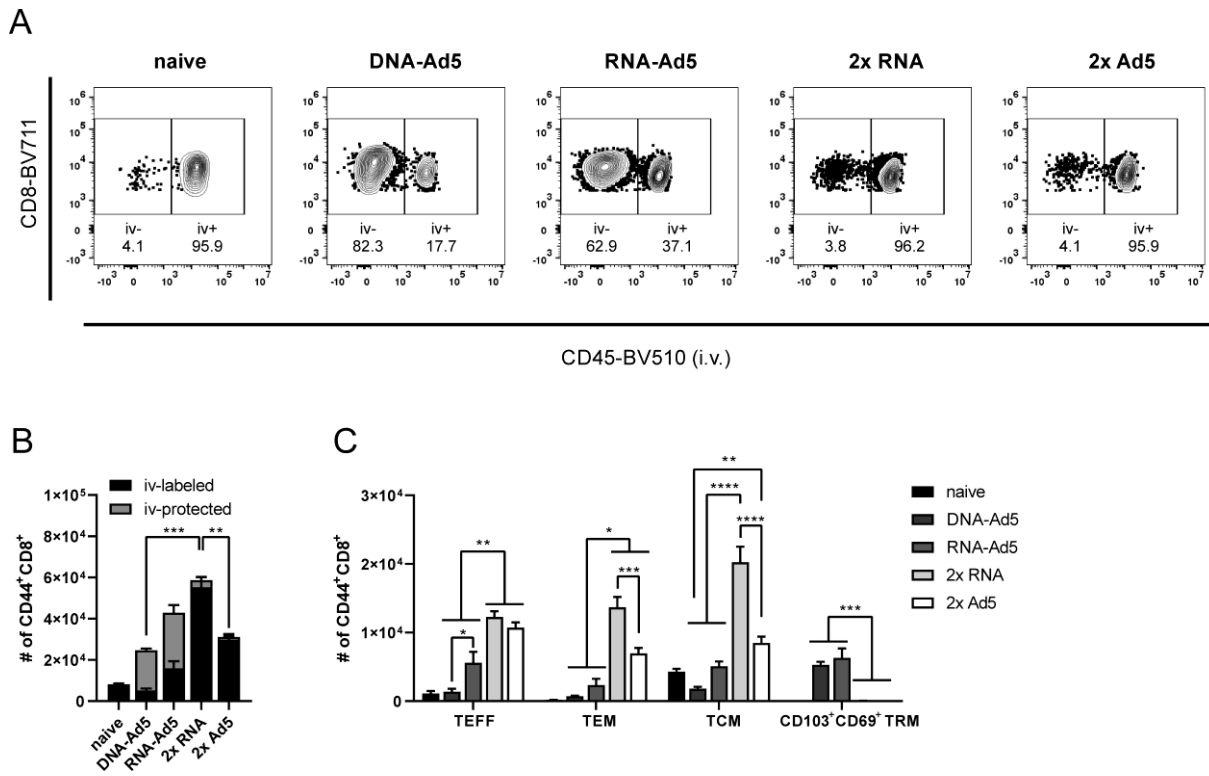

587

588 **Figure 7: Circulating and tissue-resident memory T cell subsets in the lung.** C57BL/6 mice were

589 vaccinated according to Fig. 5 A. Antigen-experienced CD8<sup>+</sup> T cells were identified by CD44 staining and  
590 intravascular staining was used to differentiate between circulating (iv-labelled) and tissue-resident

591 (iv-protected) memory cells. Representative contour plots are shown in (A). (B) The total number of  
592 CD44<sup>+</sup> CD8<sup>+</sup> with the relative contribution of iv- and iv+ cells are summarized for each group. (C) Within

593 the iv-labelled CD44<sup>+</sup> CD8<sup>+</sup> population, effector T cells (T<sub>EFF</sub>; CD127<sup>+</sup>KLRG1<sup>+</sup>), effector memory T cells  
594 (T<sub>EM</sub>; CD127<sup>+</sup>KLRG1<sup>+</sup>), and central memory T cells (T<sub>CM</sub>; CD127<sup>+</sup>KLRG1<sup>-</sup>CD69<sup>-</sup>CD103<sup>-</sup>) were defined.

595 Within the iv-protected population, T<sub>RM</sub> cells were defined as KLRG1<sup>-</sup>CD103<sup>+</sup>CD69<sup>+</sup>. The gating strategy  
596 is shown in figure S2. Bars represent group means with SEM; all groups n=4. Data were analysed by

597 one-way ANOVA followed by Tukey's multiple comparison test. Statistically significant differences  
598 were indicated only among the different vaccine groups (\*, p<0.05; \*\*, p<0.005; \*\*\*, p<0.0005; \*\*\*\*,

599 p<0.0001).

600

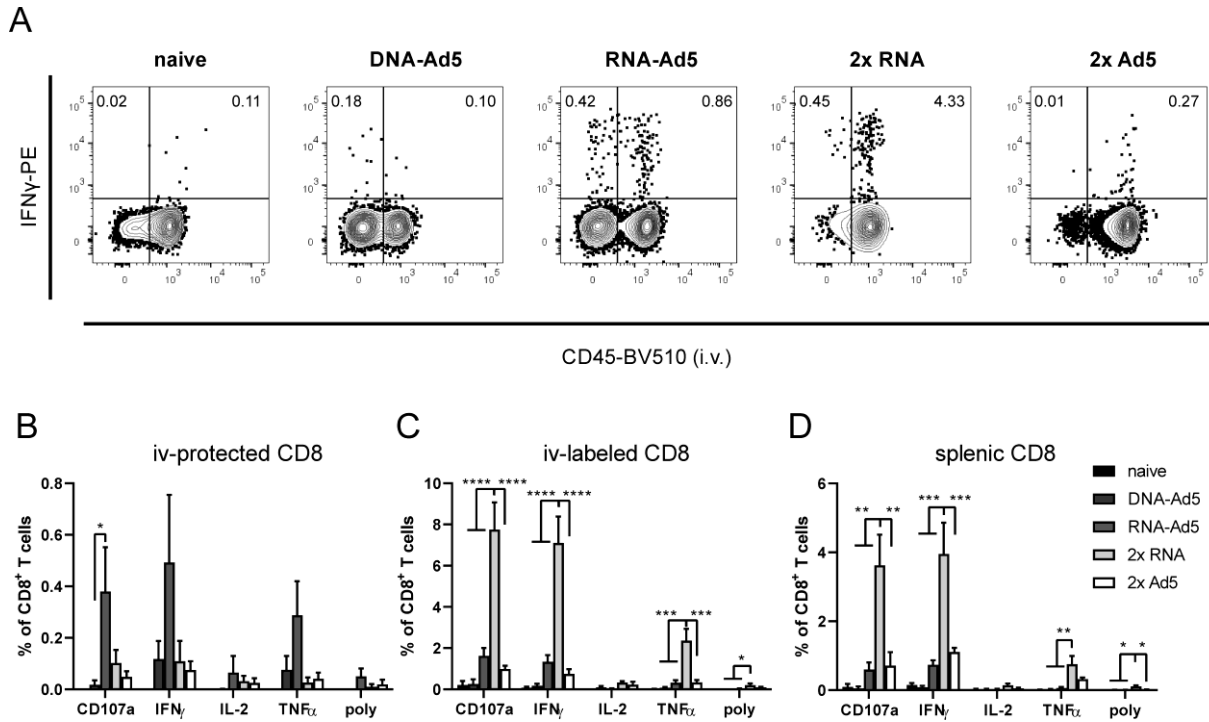

601

602 **Figure 8: Spike-specific CD8<sup>+</sup> T cell responses.** C57BL/6 mice were vaccinated according to Fig. 5 A.

603 Lung (B and C) and spleen homogenates (D) were restimulated with a peptide pool covering major

604 parts of S and the responding CD8<sup>+</sup> T cells identified by intracellular staining for accumulated cytokines

605 or staining for CD107a as degranulation marker. (A) Representative contour plots showing IFN $\gamma$

606 production in iv<sup>+</sup> and iv<sup>-</sup> lung CD8<sup>+</sup> T cells. The gating strategy is shown in figure S3. Bars represent

607 group means with SEM; all groups n=4. Data were analysed by one-way ANOVA followed by Tukey's

608 multiple comparison test. Statistically significant differences were indicated only among the different

609 vaccine groups (\*, p<0.05; \*\*, p<0.005; \*\*\*, p<0.0005; \*\*\*\*, p<0.0001). poly; polyfunctional T cell

610 population positive for all assessed markers.

611

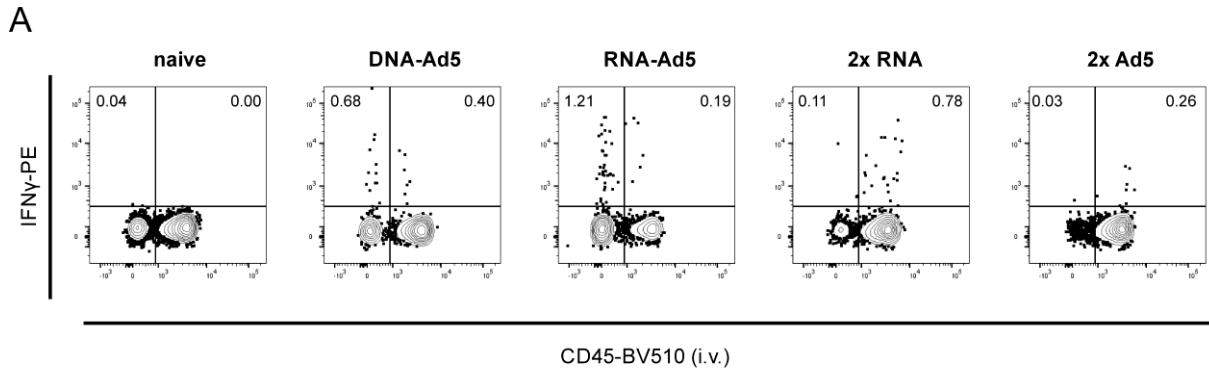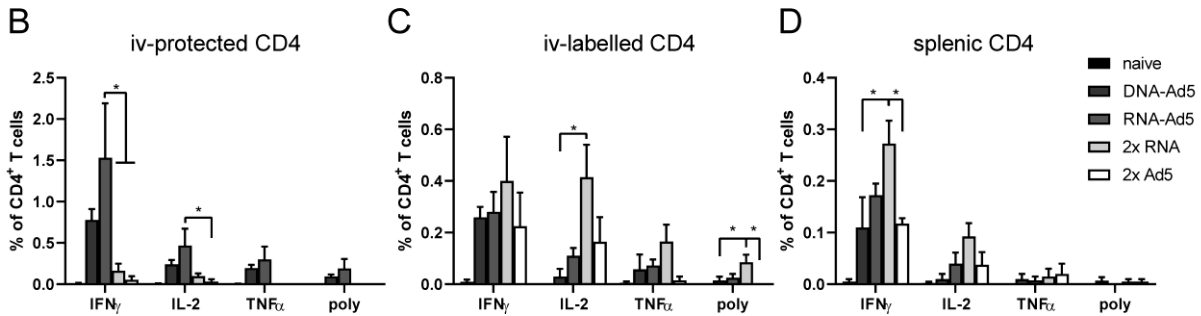

612

613 **Figure 9: Spike-specific CD4<sup>+</sup> T cell responses.** C57BL/6 mice were vaccinated according to Fig. 5 A.

614 Lung (B and C) and spleen homogenates (D) were restimulated with a peptide pool covering major

615 parts of S and the responding CD4<sup>+</sup> T cells identified by intracellular staining for accumulated cytokines.

616 (A) Representative contour plots showing IFN $\gamma$  production in iv+ and iv- lung CD4<sup>+</sup> T cells. The gating

617 strategy is shown in figure S3. Bars represent group means with SEM; all groups n=4. Data were

618 analysed by one-way ANOVA followed by Tukey's multiple comparison test. Statistically significant

619 differences were indicated only among the different vaccine groups (\*, p<0.05; \*\*, p<0.005; \*\*\*,

620 p<0.0005; \*\*\*\*, p<0.0001). poly; polyfunctional T cell population positive for all assessed markers.

621

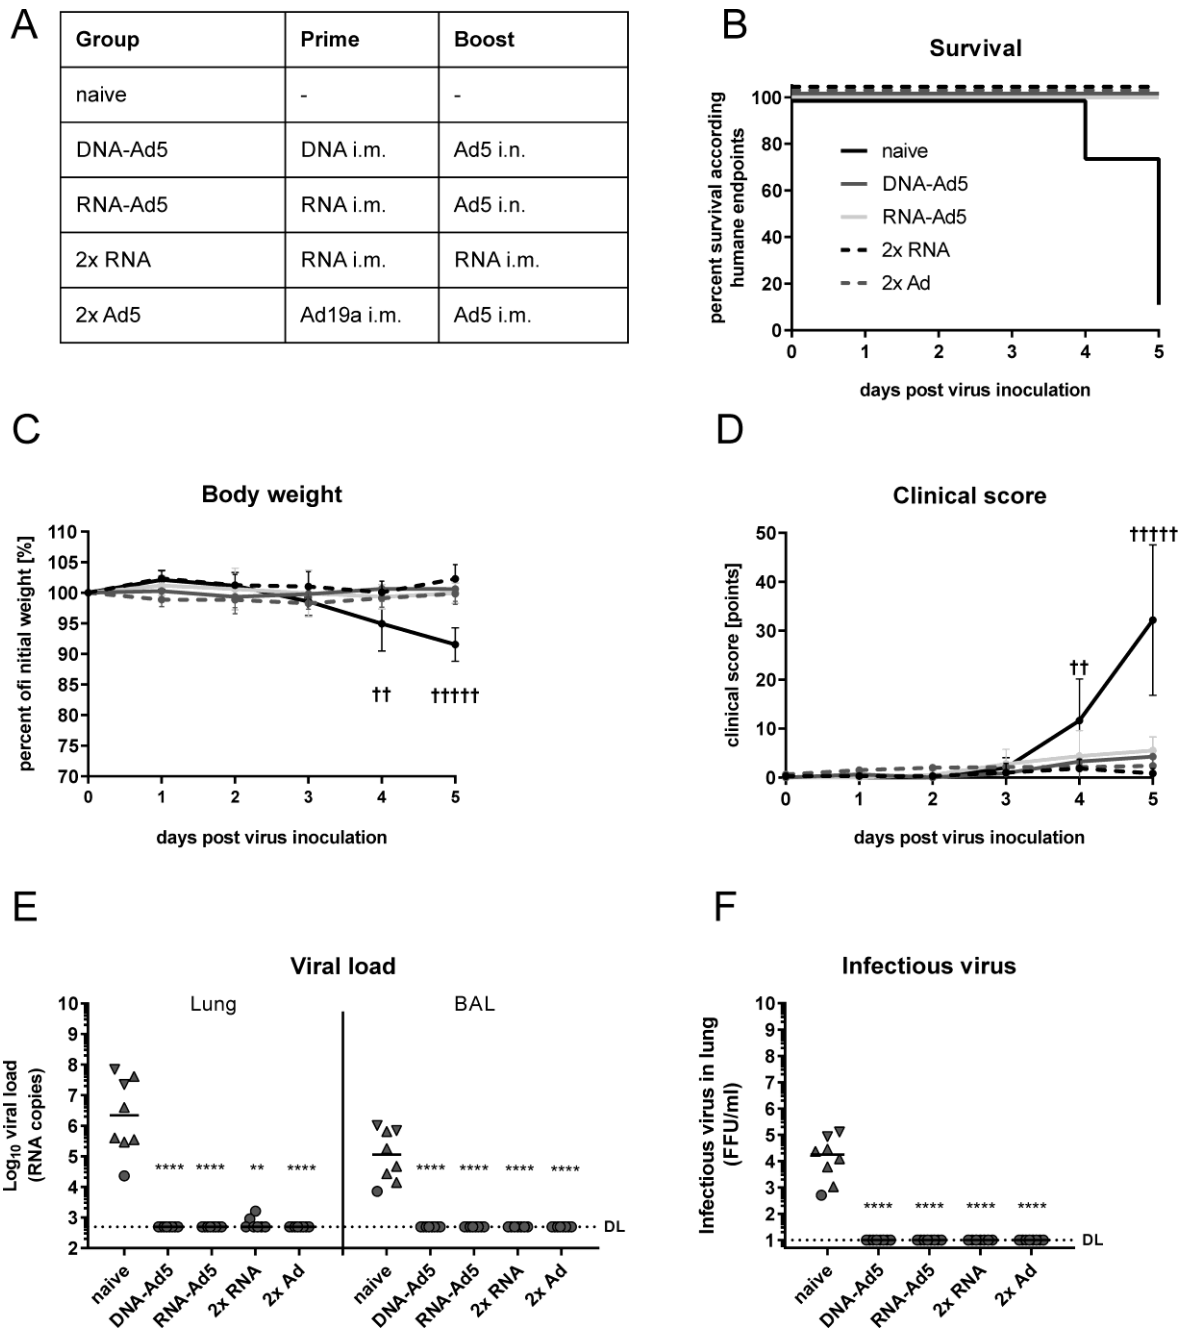

622

623 **Figure 10: Protective efficacy against SARS-CoV-2 infection.** (A) K18-hACE2 mice (2x RNA n=7, other

624 groups n=8) received an intramuscular prime immunization with the spike-encoding DNA (10  $\mu$ g)

625 followed by electroporation, Ad19-S ( $10^7$  infectious units), or the mRNA vaccine, Comirnaty<sup>®</sup> (1  $\mu$ g).

626 Mice from the heterologous prime-boost groups were boosted four weeks later intranasally or

627 intramuscularly with Ad5-S ( $10^7$  infectious units). The 2x RNA group received a second dose of mRNA

628 (1  $\mu$ g). Four weeks after the boost immunization, mice were infected intranasally with  $9 \times 10^3$  FFU SARS-

629 CoV-2. All animals were monitored daily for survival (B), body weight (C), and clinical score (D). Animals

630 reaching humane endpoints were euthanized and are marked by a cross (†). Viral RNA copy numbers  
631 were assessed in lung homogenates and BAL samples by qRT-PCR (E) and infectious virus was retrieved  
632 and titrated from lung homogenates (F). Data points shown represent viral copy number or virus titre  
633 of each animal with the median of each group, whereby circles indicate a survival of 5 days post  
634 infection and triangles indicates euthanized mouse according humane endpoints at day 4 (▼) or day  
635 5 (▲). The dashed line indicates the lower limit of detection. Data were analysed by Kruskal-Wallis test  
636 (one-way ANOVA) and Dunn's Pairwise Multiple Comparison Procedures as post hoc test in  
637 comparison to PBS control (\*,  $p < 0.05$ ; \*\*,  $p < 0.005$ ; \*\*\*,  $p < 0.0005$ ; \*\*\*\*,  $p < 0.0001$ ).

638



639 **References**

- 640 1. WHO, W. H. O. COVID-19 Weekly Epidemiological Update, Edition 50. (2021). Available at:  
641 [https://www.who.int/publications/m/item/weekly-epidemiological-update-on-covid-19---27-](https://www.who.int/publications/m/item/weekly-epidemiological-update-on-covid-19---27-july-2021)  
642 [july-2021](https://www.who.int/publications/m/item/weekly-epidemiological-update-on-covid-19---27-july-2021). (Accessed: 27th July 2021)
- 643 2. WHO, W. H. O. COVID-19 vaccine tracker and landscape. (2021). Available at:  
644 <https://www.who.int/publications/m/item/draft-landscape-of-covid-19-candidate-vaccines>.  
645 (Accessed: 21st July 2021)
- 646 3. Baden, L. R. *et al.* Efficacy and Safety of the mRNA-1273 SARS-CoV-2 Vaccine. *N. Engl. J. Med.*  
647 **384**, 403–416 (2021).
- 648 4. Polack, F. P. *et al.* Safety and Efficacy of the BNT162b2 mRNA Covid-19 Vaccine. *N. Engl. J.*  
649 *Med.* **383**, 2603–2615 (2020).
- 650 5. Voysey, M. *et al.* Safety and efficacy of the ChAdOx1 nCoV-19 vaccine (AZD1222) against  
651 SARS-CoV-2: an interim analysis of four randomised controlled trials in Brazil, South Africa,  
652 and the UK. *Lancet* **397**, 99–111 (2021).
- 653 6. Logunov, D. Y. *et al.* Safety and efficacy of an rAd26 and rAd5 vector-based heterologous  
654 prime-boost COVID-19 vaccine: an interim analysis of a randomised controlled phase 3 trial in  
655 Russia. *Lancet* **397**, 671–681 (2021).
- 656 7. Jackson, L. A. *et al.* An mRNA Vaccine against SARS-CoV-2 — Preliminary Report. *N. Engl. J.*  
657 *Med.* **383**, 1920–1931 (2020).
- 658 8. Frenck, R. W. *et al.* Safety, Immunogenicity, and Efficacy of the BNT162b2 Covid-19 Vaccine in  
659 Adolescents. *N. Engl. J. Med.* NEJMoa2107456 (2021). doi:10.1056/NEJMoa2107456
- 660 9. Sahin, U. *et al.* BNT162b2 vaccine induces neutralizing antibodies and poly-specific T cells in  
661 humans. *Nature* (2021). doi:10.1038/s41586-021-03653-6

- 662 10. Logunov, D. Y. *et al.* Safety and immunogenicity of an rAd26 and rAd5 vector-based  
663 heterologous prime-boost COVID-19 vaccine in two formulations: two open, non-randomised  
664 phase 1/2 studies from Russia. *Lancet* **396**, 887–897 (2020).
- 665 11. Folegatti, P. M. *et al.* Safety and immunogenicity of the ChAdOx1 nCoV-19 vaccine against  
666 SARS-CoV-2: a preliminary report of a phase 1/2, single-blind, randomised controlled trial.  
667 *Lancet* **396**, 467–478 (2020).
- 668 12. Kustin, T. *et al.* Evidence for increased breakthrough rates of SARS-CoV-2 variants of concern  
669 in BNT162b2-mRNA-vaccinated individuals. *Nat. Med.* (2021). doi:10.1038/s41591-021-  
670 01413-7
- 671 13. Abu-Raddad, L. J., Chemaitelly, H. & Butt, A. A. Effectiveness of the BNT162b2 Covid-19  
672 Vaccine against the B.1.1.7 and B.1.351 Variants. *N. Engl. J. Med.* NEJMc2104974 (2021).  
673 doi:10.1056/NEJMc2104974
- 674 14. Emary, K. R. W. *et al.* Efficacy of ChAdOx1 nCoV-19 (AZD1222) vaccine against SARS-CoV-2  
675 variant of concern 202012/01 (B.1.1.7): an exploratory analysis of a randomised controlled  
676 trial. *Lancet* **397**, 1351–1362 (2021).
- 677 15. Madhi, S. A. *et al.* Efficacy of the ChAdOx1 nCoV-19 Covid-19 Vaccine against the B.1.351  
678 Variant. *N. Engl. J. Med.* **384**, 1885–1898 (2021).
- 679 16. Hacisuleyman, E. *et al.* Vaccine Breakthrough Infections with SARS-CoV-2 Variants. *N. Engl. J.*  
680 *Med.* **384**, 2212–2218 (2021).
- 681 17. Farinholt, T. *et al.* Transmission event of SARS-CoV-2 Delta variant reveals multiple vaccine  
682 breakthrough infections. *medRxiv Prepr. Serv. Heal. Sci.* (2021).  
683 doi:10.1101/2021.06.28.21258780
- 684 18. Brosh-Nissimov, T. *et al.* BNT162b2 vaccine breakthrough: clinical characteristics of 152 fully  
685 vaccinated hospitalized COVID-19 patients in Israel. *Clin. Microbiol. Infect.* (2021).

686 doi:10.1016/j.cmi.2021.06.036

- 687 19. Levine-Tiefenbrun, M. *et al.* Initial report of decreased SARS-CoV-2 viral load after inoculation  
688 with the BNT162b2 vaccine. *Nat. Med.* (2021). doi:10.1038/s41591-021-01316-7
- 689 20. Harris, R. J. *et al.* Effect of Vaccination on Household Transmission of SARS-CoV-2 in England.  
690 *N. Engl. J. Med.* NEJMc2107717 (2021). doi:10.1056/NEJMc2107717
- 691 21. Asahi-Ozaki, Y. *et al.* Secretory IgA antibodies provide cross-protection against infection with  
692 different strains of influenza B virus. *J. Med. Virol.* **74**, 328–335 (2004).
- 693 22. Renegar, K. B., Small, P. A., Boykins, L. G. & Wright, P. F. Role of IgA versus IgG in the Control  
694 of Influenza Viral Infection in the Murine Respiratory Tract. *J. Immunol.* **173**, 1978–1986  
695 (2004).
- 696 23. Okuya, K. *et al.* Potential Role of Nonneutralizing IgA Antibodies in Cross-Protective Immunity  
697 against Influenza A Viruses of Multiple Hemagglutinin Subtypes. *J. Virol.* **94**, (2020).
- 698 24. Terauchi, Y. *et al.* IgA polymerization contributes to efficient virus neutralization on human  
699 upper respiratory mucosa after intranasal inactivated influenza vaccine administration. *Hum.*  
700 *Vaccin. Immunother.* **14**, 1351–1361 (2018).
- 701 25. Ambrose, C. S., Wu, X., Jones, T. & Mallory, R. M. The role of nasal IgA in children vaccinated  
702 with live attenuated influenza vaccine. *Vaccine* **30**, 6794–6801 (2012).
- 703 26. Gould, V. M. W. *et al.* Nasal IgA Provides Protection against Human Influenza Challenge in  
704 Volunteers with Low Serum Influenza Antibody Titre. *Front. Microbiol.* **8**, (2017).
- 705 27. Aina, A. *et al.* Human immune responses elicited by an intranasal inactivated H5 influenza  
706 vaccine. *Microbiol. Immunol.* **64**, 313–325 (2020).
- 707 28. Morokutti, A., Muster, T. & Ferko, B. Intranasal vaccination with a replication-deficient  
708 influenza virus induces heterosubtypic neutralising mucosal IgA antibodies in humans. *Vaccine*

- 709           **32**, 1897–1900 (2014).
- 710    29.    Ainai, A. *et al.* Intranasal vaccination with an inactivated whole influenza virus vaccine induces  
711           strong antibody responses in serum and nasal mucus of healthy adults. *Hum. Vaccin.*  
712           *Immunother.* **9**, 1962–1970 (2013).
- 713    30.    Lapiente, D. *et al.* IL-1 $\beta$  as mucosal vaccine adjuvant: the specific induction of tissue-resident  
714           memory T cells improves the heterosubtypic immunity against influenza A viruses. *Mucosal*  
715           *Immunol.* **11**, 1265–1278 (2018).
- 716    31.    See, R. H. *et al.* Comparative evaluation of two severe acute respiratory syndrome (SARS)  
717           vaccine candidates in mice challenged with SARS coronavirus. *J. Gen. Virol.* **87**, 641–650  
718           (2006).
- 719    32.    Kim, M. H., Kim, H. J. & Chang, J. Superior immune responses induced by intranasal  
720           immunization with recombinant adenovirus-based vaccine expressing full-length Spike protein  
721           of Middle East respiratory syndrome coronavirus. *PLoS One* **14**, e0220196 (2019).
- 722    33.    Iborra, S. *et al.* Optimal Generation of Tissue-Resident but Not Circulating Memory T Cells  
723           during Viral Infection Requires Crosspriming by DNGR-1+ Dendritic Cells. *Immunity* **45**, 847–  
724           860 (2016).
- 725    34.    Teijaro, J. R. *et al.* Cutting Edge: Tissue-Retentive Lung Memory CD4 T Cells Mediate Optimal  
726           Protection to Respiratory Virus Infection. *J. Immunol.* **187**, 5510–5514 (2011).
- 727    35.    Takamura, S. *et al.* Specific niches for lung-resident memory CD8 + T cells at the site of tissue  
728           regeneration enable CD69-independent maintenance. *J. Exp. Med.* **213**, 3057–3073 (2016).
- 729    36.    Park, S. L. *et al.* Local proliferation maintains a stable pool of tissue-resident memory T cells  
730           after antiviral recall responses. *Nat. Immunol.* **19**, 183–191 (2018).
- 731    37.    Schenkel, J. M., Fraser, K. a, Vezys, V. & Masopust, D. Sensing and alarm function of resident  
732           memory CD8(+) T cells. *Nat. Immunol.* **14**, 509–13 (2013).

- 733 38. Mackay, L. K. *et al.* Hobit and Blimp1 instruct a universal transcriptional program of tissue  
734 residency in lymphocytes. *Science (80-. )*. **352**, 459–463 (2016).
- 735 39. Wakim, L. M. *et al.* The Molecular Signature of Tissue Resident Memory CD8 T Cells Isolated  
736 from the Brain. *J. Immunol.* **189**, 3462–3471 (2012).
- 737 40. Wu, T. *et al.* Lung-resident memory CD8 T cells (TRM) are indispensable for optimal cross-  
738 protection against pulmonary virus infection. *J. Leukoc. Biol.* **95**, 215–224 (2014).
- 739 41. Zens, K. D., Chen, J. K. & Farber, D. L. Vaccine-generated lung tissue–resident memory T cells  
740 provide heterosubtypic protection to influenza infection. *JCI Insight* **1**, (2016).
- 741 42. Luangrath, M. A., Schmidt, M. E., Hartwig, S. M. & Varga, S. M. Tissue-Resident Memory T  
742 Cells in the Lungs Protect against Acute Respiratory Syncytial Virus Infection. *ImmunoHorizons*  
743 **5**, 59–69 (2021).
- 744 43. Darrah, P. A. *et al.* Prevention of tuberculosis in macaques after intravenous BCG  
745 immunization. *Nature* **577**, 95–102 (2020).
- 746 44. Sakai, S. *et al.* Cutting Edge: Control of Mycobacterium tuberculosis Infection by a Subset of  
747 Lung Parenchyma-Homing CD4 T Cells. *J. Immunol.* **192**, 2965–2969 (2014).
- 748 45. Jozwik, A. *et al.* RSV-specific airway resident memory CD8+ T cells and differential disease  
749 severity after experimental human infection. *Nat. Commun.* **6**, 10224 (2015).
- 750 46. Guvenel, A. *et al.* Epitope-specific airway-resident CD4+ T cell dynamics during experimental  
751 human RSV infection. *J. Clin. Invest.* **130**, 523–538 (2019).
- 752 47. Hassan, A. O. *et al.* A Single-Dose Intranasal ChAd Vaccine Protects Upper and Lower  
753 Respiratory Tracts against SARS-CoV-2. *Cell* **183**, 169–184.e13 (2020).
- 754 48. Hassan, A. O. *et al.* A single intranasal dose of chimpanzee adenovirus-vectored vaccine  
755 protects against SARS-CoV-2 infection in rhesus macaques. *Cell Reports Med.* **2**, 100230

- 756 (2021).
- 757 49. Bricker, T. L. *et al.* A single intranasal or intramuscular immunization with chimpanzee  
758 adenovirus-vectored SARS-CoV-2 vaccine protects against pneumonia in hamsters. *Cell Rep.*  
759 109400 (2021). doi:10.1016/j.celrep.2021.109400
- 760 50. van Doremalen, N. *et al.* ChAdOx1 nCoV-19 vaccine prevents SARS-CoV-2 pneumonia in  
761 rhesus macaques. *Nature* **586**, 578–582 (2020).
- 762 51. van Doremalen, N. *et al.* Intranasal ChAdOx1 nCoV-19/AZD1222 vaccination reduces shedding  
763 of SARS-CoV-2 D614G in rhesus macaques. *bioRxiv Prepr. Serv. Biol.* (2021).  
764 doi:10.1101/2021.01.09.426058
- 765 52. Altimmune, I. Altimmune Announces Update On AdCOVID™ Phase 1 Clinical Trial. (2021).  
766 Available at: [https://ir.altimmune.com/news-releases/news-release-details/altimmune-](https://ir.altimmune.com/news-releases/news-release-details/altimmune-announces-update-adcovidtm-phase-1-clinical-trial)  
767 [announces-update-adcovidtm-phase-1-clinical-trial](https://ir.altimmune.com/news-releases/news-release-details/altimmune-announces-update-adcovidtm-phase-1-clinical-trial). (Accessed: 21st July 2021)
- 768 53. Wu, S. *et al.* Safety, tolerability, and immunogenicity of an aerosolised adenovirus type-5  
769 vector-based COVID-19 vaccine (Ad5-nCoV) in adults: preliminary report of an open-label and  
770 randomised phase 1 clinical trial. *Lancet Infect. Dis.* (2021). doi:10.1016/S1473-  
771 3099(21)00396-0
- 772 54. Lapuente, D. *et al.* Rapid response flow cytometric assay for the detection of antibody  
773 responses to SARS-CoV-2. *Eur. J. Clin. Microbiol. Infect. Dis.* (2020). doi:10.1007/s10096-020-  
774 04072-7
- 775 55. Anderson, K. G. *et al.* Cutting Edge: Intravascular Staining Redefines Lung CD8 T Cell  
776 Responses. *J. Immunol.* **189**, 2702–2706 (2012).
- 777 56. Peter, A. S. *et al.* A pair of non-competing neutralizing human monoclonal antibodies  
778 protecting from disease in a SARS-CoV-2 infection model. *bioRxiv* 2021.04.16.440101 (2021).  
779 doi:10.1101/2021.04.16.440101

- 780 57. Spencer, A. J. *et al.* Heterologous vaccination regimens with self-amplifying RNA and  
781 adenoviral COVID vaccines induce robust immune responses in mice. *Nat. Commun.* **12**, 2893  
782 (2021).
- 783 58. He, Q. *et al.* Heterologous prime-boost: breaking the protective immune response bottleneck  
784 of COVID-19 vaccine candidates. *Emerg. Microbes Infect.* **10**, 629–637 (2021).
- 785 59. Barros-Martins, J. *et al.* Immune responses against SARS-CoV-2 variants after heterologous  
786 and homologous ChAdOx1 nCoV-19/BNT162b2 vaccination. *Nat. Med.* (2021).  
787 doi:10.1038/s41591-021-01449-9
- 788 60. Borobia, A. M. *et al.* Immunogenicity and reactogenicity of BNT162b2 booster in ChAdOx1-S-  
789 primed participants (CombiVacS): a multicentre, open-label, randomised, controlled, phase 2  
790 trial. *Lancet* **398**, 121–130 (2021).
- 791 61. Normark, J. *et al.* Heterologous ChAdOx1 nCoV-19 and mRNA-1273 Vaccination. *N. Engl. J.*  
792 *Med.* NEJMc2110716 (2021). doi:10.1056/NEJMc2110716
- 793 62. Tenbusch, M. *et al.* Heterologous prime–boost vaccination with ChAdOx1 nCoV-19 and  
794 BNT162b2. *Lancet Infect. Dis.* (2021). doi:10.1016/S1473-3099(21)00420-5
- 795 63. Lapuente, D., Ruzsics, Z., Thirion, C. & Tenbusch, M. Evaluation of adenovirus 19a as a novel  
796 vector for mucosal vaccination against influenza A viruses. *Vaccine* **36**, 2712–2720 (2018).
- 797 64. Çuburu, N. *et al.* A Prime-Pull-Amplify Vaccination Strategy To Maximize Induction of  
798 Circulating and Genital-Resident Intraepithelial CD8 + Memory T Cells. *J. Immunol.* **202**, 1250–  
799 1264 (2019).
- 800 65. Marsh, G. A. *et al.* ChAdOx1 nCoV-19 (AZD1222) vaccine candidate significantly reduces SARS-  
801 CoV-2 shedding in ferrets. *npj Vaccines* **6**, 67 (2021).
- 802 66. Bergelson, J. M. *et al.* Isolation of a common receptor for Coxsackie B viruses and  
803 adenoviruses 2 and 5. *Science* **275**, 1320–3 (1997).

- 804 67. Arnberg, N., Kidd, A. H., Edlund, K., Olfat, F. & Wadell, G. Initial Interactions of Subgenus D  
805 Adenoviruses with A549 Cellular Receptors: Sialic Acid versus alpha v Integrins. *J. Virol.* **74**,  
806 7691–7693 (2000).
- 807 68. Cashman, S. M., Morris, D. J. & Kumar-Singh, R. Adenovirus type 5 pseudotyped with  
808 adenovirus type 37 fiber uses sialic acid as a cellular receptor. *Virology* **324**, 129–139 (2004).
- 809 69. Wu, E. *et al.* Membrane Cofactor Protein Is a Receptor for Adenoviruses Associated with  
810 Epidemic Keratoconjunctivitis. *J. Virol.* **78**, 3897–3905 (2004).
- 811 70. Hsieh, C.-L. *et al.* Structure-based design of prefusion-stabilized SARS-CoV-2 spikes. *Science*  
812 (80- ). **369**, 1501–1505 (2020).
- 813 71. Dinnon, K. H. *et al.* A mouse-adapted model of SARS-CoV-2 to test COVID-19  
814 countermeasures. *Nature* **586**, 560–566 (2020).
- 815 72. Rathnasinghe, R. *et al.* The N501Y mutation in SARS-CoV-2 spike leads to morbidity in obese  
816 and aged mice and is neutralized by convalescent and post-vaccination human sera. *medRxiv*  
817 2021.01.19.21249592 (2021). doi:10.1101/2021.01.19.21249592
- 818 73. Ma, Y. *et al.* SARS-CoV-2 infection aggravates chronic comorbidities of cardiovascular diseases  
819 and diabetes in mice. *Anim. Model. Exp. Med.* **4**, 2–15 (2021).
- 820 74. Lillie, P. J. *et al.* Preliminary Assessment of the Efficacy of a T-Cell–Based Influenza Vaccine,  
821 MVA-NP+M1, in Humans. *Clin. Infect. Dis.* **55**, 19–25 (2012).
- 822 75. Pleguezuelos, O. *et al.* Efficacy of FLU-v, a broad-spectrum influenza vaccine, in a randomized  
823 phase IIb human influenza challenge study. *npj Vaccines* **5**, 22 (2020).
- 824 76. Khoury, D. S. *et al.* Neutralizing antibody levels are highly predictive of immune protection  
825 from symptomatic SARS-CoV-2 infection. *Nat. Med.* **27**, 1205–1211 (2021).
- 826 77. Earle, K. A. *et al.* Evidence for antibody as a protective correlate for COVID-19 vaccines.



- 827            *Vaccine* **39**, 4423–4428 (2021).
- 828    78.    Lucas, C. *et al.* Longitudinal analyses reveal immunological misfiring in severe COVID-19.  
829            *Nature* **584**, 463–469 (2020).
- 830    79.    Van Kampen, K. R. *et al.* Safety and immunogenicity of adenovirus-vectored nasal and  
831            epicutaneous influenza vaccines in humans. *Vaccine* **23**, 1029–1036 (2005).
- 832    80.    Tasker, S. *et al.* Safety and Immunogenicity of a Novel Intranasal Influenza Vaccine (NasoVAX):  
833            A Phase 2 Randomized, Controlled Trial. *Vaccines* **9**, 224 (2021).
- 834    81.    Hörnich, B. F. *et al.* SARS-CoV-2 and SARS-CoV Spike-Mediated Cell-Cell Fusion Differ in Their  
835            Requirements for Receptor Expression and Proteolytic Activation. *J. Virol.* **95**, (2021).
- 836    82.    Ruzsics, Z., Lemnitzer, F. & Thirion, C. Engineering adenovirus genome by bacterial artificial  
837            chromosome (BAC) technology. *Methods Mol. Biol.* **1089**, 143–58 (2014).
- 838    83.    Vogel, A. B. *et al.* BNT162b vaccines protect rhesus macaques from SARS-CoV-2. *Nature* **592**,  
839            283–289 (2021).
- 840    84.    Lapuente, D. *et al.* Innate signalling molecules as genetic adjuvants do not alter the efficacy of  
841            a DNA-based influenza A vaccine. *PLoS One* **15**, e0231138 (2020).
- 842    85.    Dispinseri, S. *et al.* Neutralizing antibody responses to SARS-CoV-2 in symptomatic COVID-19  
843            is persistent and critical for survival. *Nat. Commun.* **12**, 2670 (2021).
- 844    86.    Hoffmann, M. *et al.* SARS-CoV-2 variants B.1.351 and P.1 escape from neutralizing antibodies.  
845            *Cell* **184**, 2384–2393.e12 (2021).
- 846    87.    Hoffmann, M. *et al.* SARS-CoV-2 variant B.1.617 is resistant to bamlanivimab and evades  
847            antibodies induced by infection and vaccination. *Cell Rep.* 109415 (2021).  
848            doi:10.1016/j.celrep.2021.109415
- 849    88.    Arora, P. *et al.* Increased lung cell entry of B.1.617.2 and evasion of antibodies induced by

850 infection and BNT162b2 vaccination. *bioRxiv* 2021.06.23.449568 (2021).

851 doi:10.1101/2021.06.23.449568

852 89. Groß, R. *et al.* Detection of SARS-CoV-2 in human breastmilk. *Lancet* **395**, 1757–1758 (2020).

853 90. Case, J. B., Bailey, A. L., Kim, A. S., Chen, R. E. & Diamond, M. S. Growth, detection,

854 quantification, and inactivation of SARS-CoV-2. *Virology* **548**, 39–48 (2020).

855

856
